# Supplementary material
Source: PubMed Central journal article supplement (PMC7153032)
Supplement: ml9b00611_si_001.pdf [file ml9b00611_si_001.pdf]

# SUPPORTING INFORMATION

## Discovery of CNS-Penetrant Apoptosis Signal-Regulating Kinase 1 (ASK1) Inhibitors

Zhili Xin,<sup>a</sup> Martin K. Himmelbauer,<sup>a</sup> J. Howard Jones,<sup>a</sup> Istvan Enyedy,<sup>a</sup> Rab Gilfillan,<sup>a</sup> Thomas Hesson,<sup>b</sup> Kristopher King,<sup>c</sup> Douglas J. Marcotte,<sup>d</sup> Paramasivam Murugan,<sup>b</sup> Joseph C. Santoro,<sup>b</sup> and Felix Gonzalez-Lopez de Turiso<sup>a,\*</sup>

<sup>a</sup>Medicinal Chemistry; <sup>b</sup>Bioassays; <sup>c</sup>Drug Metabolism and Pharmacokinetics; <sup>d</sup>Physical Biochemistry and Molecular Design. Biotherapeutic and Medicinal Science. Biogen. 225 Binney Street, Cambridge, MA 02142. United States.

- (i) Experimental procedures for all the compounds described in this manuscript (S1-S25)
- (ii) Experimental conditions for crystallization, collection and refinement statistics for compound **21** (S25)
- (iii) Kinase selectivity profile for compound **21** (S25-S36)

### EXPERIMENTAL SECTION

All solvents and chemicals used were reagent grade. Anhydrous solvents were purchased from Sigma-Aldrich and used as received. Analytical thin layer chromatography (TLC) and silica gel column chromatography were performed on Merck silica gel 60 (230-400 mesh). Removal of solvents was conducted by using a rotary evaporator and residual solvents were removed from non-volatile compounds using a vacuum manifold maintained at approximately 1 Torr. NMR spectra were recorded on a Bruker Avance 400 MHz, 500 MHz and 600 MHz NMR spectrometer. Chemical shifts ( $\delta$ ) are reported in parts per million (ppm) relative to residual undeuterated solvent as internal reference and coupling constants ( $J$ ) are reported in hertz (Hz). Splitting patterns are indicated as follows: s = singlet; d = doublet; t = triplet; q = quartet; qn = quintet; dd = doublet of doublets; dt = doublet of triplets; tt = triplet of triplets; m = multiplet; br = broad peak. All yields reported are isolated yields. All final compounds were purified to  $\geq 95\%$  purity as determined by LC/MS analysis (using a lineal gradient of elution: 90% water in trifluoroacetic acid (containing 0.1% v/v)/10% CH<sub>3</sub>CN in trifluoroacetic acid (containing 0.1% v/v) to 10% water in trifluoroacetic acid (containing 0.1% v/v) and 90% CH<sub>3</sub>CN in trifluoroacetic acid (0.1% v/v) for 2 minutes and

then holding at 10% water in trifluoroacetic acid (0.1% v/v) and 90% CH<sub>3</sub>CN in trifluoroacetic acid (0.1% v/v) up to 3 minutes at a flowrate of 3 mL/min (injection volume 5 μL and using a Waters Sunfire C18 3.5 μm 4.6x20mm IS column)). MS mode: MS:ESI+ scan range 100-1000 daltons. PDA detection 210-400 nm. Final compounds were analyzed using UPLC (Water's Acquity (Waters Milford, MA)) coupled with an AB Sciex 6600 Triple-TOF mass spectrometer (AB Sciex Framingham, MA). A Water's Acquity HSS T3 (1.7 μm beads, 2.1x50mm) column was used for separation. Mobile phase A was water with 0.1% formic acid and mobile phase B was acetonitrile with 0.1% formic acid. The flow rate was 0.45 ml/min and the following gradient was used from 0-0.2 minutes 5% B and increased linearly to 65% B at 5 minutes and 90% at 6.1 min and remained there for 0.4 minutes, dropped back to 5% B over 0.1 minutes and remained there for 0.4 minutes. The mass spectrometer was operated in positive ion mode. An electrospray ionization source was used with the following parameters: Ionspray voltage floating 4500 V, ion source gas 1 50 (arbitrary units), ion source gas 2 50 (arbitrary units), curtain gas 30 (arbitrary units), and temperature 500 °C.

(i) **Experimental procedures for all the compounds described in this manuscript**

**Compound 5: *N*-(6-(4-isopropyl-4*H*-1,2,4-triazol-3-yl)pyridin-2-yl)benzamide**

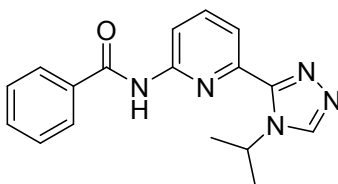

To a solution of DMAP (29 mg, 0.24 mmol) in dichloromethane (1.00 mL) was added benzoyl chloride (31 mg, 0.22 mmol, 26 μL) at room temperature. After 5 min 6-(4-isopropyl-1,2,4-triazol-3-yl)pyridin-2-amine (41 mg, 0.20 mmol) was added to the above mixture. The reaction mixture was stirred at room temperature for 24 hours and was partitioned between EtOAc and water. Upon addition of 1N HCl a precipitate formed and the title compound (20 mg, 32%) was collected by filtration as an off white solid. <sup>1</sup>H NMR (400 MHz, DMSO-*d*<sub>6</sub>) δ ppm 10.74 (s, 1H), 8.86 (s, 1H), 8.19 (dd, *J*=8.28, 1.00 Hz, 1H), 8.02 (dd, *J*=8.28, 7.53 Hz, 1H), 7.99 - 7.94 (m, 2H), 7.87 (dd,

$J=7.53$ , 1.00 Hz, 1H), 7.65 - 7.61 (m, 1H), 7.59 - 7.53 (m, 2H), 5.78 - 5.66 (m, 1H), 1.44 (d,  $J=6.53$  Hz, 6H).  $^{13}\text{C}$  NMR (101 MHz,  $\text{DMSO-}d_6$ )  $\delta$  ppm 167.1, 152.0, 150.4, 146.7, 146.6, 139.9, 135.0, 132.5, 128.9, 128.6, 119.6, 115.5, 48.3, 23.7. HRMS ( $m/z$ ):  $[\text{M} + \text{H}]^+$  calcd. for  $\text{C}_{17}\text{H}_{18}\text{N}_5\text{O}$  308.1506; found: 308.1506. HPLC ( $\text{CH}_3\text{CN}$  in 0.1% TFA):  $t_R = 1.50$  min (100% purity).

**Compound 6: *N*-(6-(4-Isopropyl-4*H*-1,2,4-triazol-3-yl)pyridin-2-yl)-1-methyl-1*H*-pyrazole-3-carboxamide**

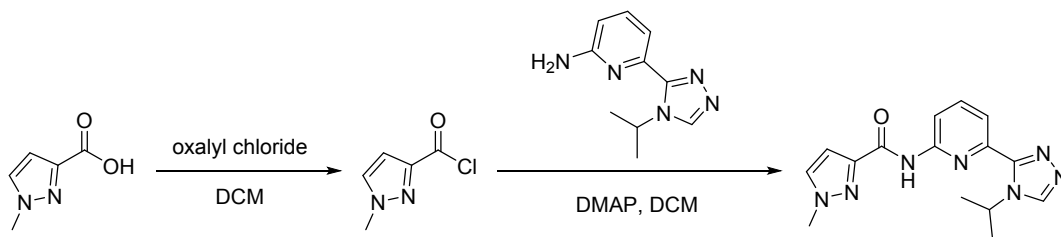

**Step A: 1-Methyl-1*H*-pyrazole-3-carbonyl chloride**

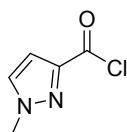

To a stirred solution of 1-methylpyrazole-3-carboxylic acid (28 mg, 0.22 mmol) in DCM (1 mL) was added oxalyl chloride (24  $\mu\text{L}$ , 0.29 mmol), followed by a catalytic amount of DMF (1 drop). The reaction was stirred at rt for 2 h. The reaction mixture was evaporated *in vacuo* and the product was used without further purification in the next step.

**Step B: *N*-(6-(4-Isopropyl-4*H*-1,2,4-triazol-3-yl)pyridin-2-yl)-1-methyl-1*H*-pyrazole-3-carboxamide**

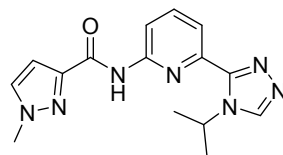

To a stirred solution of 1-methylpyrazole-3-carbonyl chloride (32 mg, 0.22 mmol) in dichloromethane (1 mL) was added DMAP (29 mg, 0.24 mmol) and the mixture was stirred at rt for 5 minutes. After this time 6-(4-isopropyl-1,2,4-triazol-3-yl)pyridin-2-amine (41 mg, 0.2 mmol) was added. The mixture was stirred at rt overnight. The reaction was quenched with MeOH,

purified by prep-HPLC (using a Sunfire Prep C18 OBD 5  $\mu\text{m}$ ; 30x50mm column; and using water (containing 0.1% TFA)-MeCN (0.1%TFA) as mobile phase; from 10-90%) to give the title compound (20 mg, 24%) as a white powder after lyophilization.  $^1\text{H}$  NMR (400 MHz,  $\text{CD}_3\text{OD}$ )  $\delta$  ppm 9.34 - 9.24 (m, 1H), 8.40 (dd,  $J=0.88$ , 8.41 Hz, 1H), 8.05 (dd,  $J=7.65$ , 8.41 Hz, 1H), 7.87 (dd,  $J=0.75$ , 7.53 Hz, 1H), 7.72 (d,  $J=2.76$  Hz, 1H), 6.88 (d,  $J=2.51$  Hz, 1H), 5.75 (spt,  $J=6.73$  Hz, 1H), 4.02 (s, 3H), 1.62 (d,  $J=6.78$  Hz, 6H).  $^1\text{H}$  NMR (400 MHz,  $\text{DMSO}-d_6$ )  $\delta$  ppm 9.99 (s, 1H), 9.01 (s, 1H), 8.21 (dd,  $J=0.75$ , 8.28 Hz, 1H), 8.03 (t,  $J=7.91$  Hz, 1H), 7.91 (d,  $J=2.26$  Hz, 1H), 7.85 (dd,  $J=0.88$ , 7.65 Hz, 1H), 6.85 (d,  $J=2.26$  Hz, 1H), 5.62 (spt,  $J=6.65$  Hz, 1H), 3.98 (s, 3H), 1.48 (d,  $J=6.53$  Hz, 6H).  $^{13}\text{C}$  NMR (101 MHz,  $\text{DMSO}-d_6$ )  $\delta$  ppm 160.0, 150.8, 149.9, 145.8, 145.3, 143.2, 139.7, 133.5, 119.3, 114.6, 107.0, 48.2, 39.2, 23.1. HRMS ( $m/z$ ):  $[\text{M} + \text{H}]^+$  calcd. for  $\text{C}_{15}\text{H}_{18}\text{N}_7\text{O}$  312.1567; found: 312.1571. HPLC ( $\text{CH}_3\text{CN}$  in 0.1% TFA):  $t_R = 1.21$  min (100% purity).

**Compound 7: *N*-(6-(4-Isopropyl-4*H*-1,2,4-triazol-3-yl)pyridin-2-yl)-1-methyl-1*H*-pyrazole-4-carboxamide**

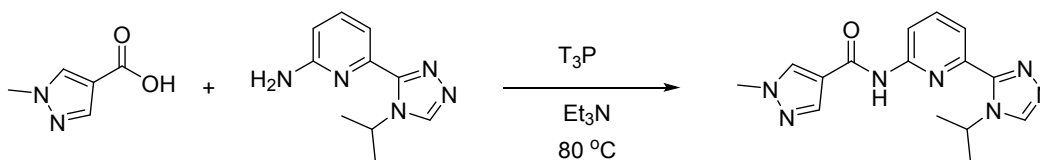

To a mixture of 6-(4-isopropyl-1,2,4-triazol-3-yl)pyridin-2-amine (61 mg, 0.30 mmol) and 1-methyl-1*H*-pyrazole-4-carboxylic acid (45 mg, 0.36 mmol) in a reaction vial was added triethylamine (0.5 mL, 3.6 mmol) and propylphosphonic anhydride ( $\geq 50$  wt% in EtOAc, 0.5 mL). The mixture was heated at 80  $^{\circ}\text{C}$  for 4 h. After this time the mixture was quenched with a small amount of MeOH ( $\sim 2$  mL) and then it was partitioned between EtOAc and water. The aqueous layer was extracted with EtOAc and the combined organic extracts were dried over  $\text{MgSO}_4$ , filtered and concentrated *in vacuo*. The residue was purified by normal phase column eluted with EtOAc/EtOH (3/1) to give the title compound (34 mg, 36%).  $^1\text{H}$  NMR (400 MHz,  $\text{CD}_3\text{OD}$ )  $\delta$  ppm 8.82 (s, 1H), 8.32 - 8.20 (m, 2H), 8.08 (s, 1H), 7.98 (t,  $J=8.03$  Hz, 1H), 7.81 (d,  $J=7.53$  Hz, 1H), 5.75 (quin,  $J=6.71$  Hz, 1H), 3.97 (s, 3H), 1.54 (d,  $J=6.78$  Hz, 6H).  $^1\text{H}$  NMR (400 MHz,  $\text{DMSO}-d_6$ )  $\delta$  ppm 10.31 (s, 1H), 8.87 (s, 1H), 8.44 (s, 1H), 8.17 (dd,  $J=0.88$ , 8.41 Hz, 1H), 8.09 (s, 1H), 8.01 - 7.95 (m, 1H), 7.77 (dd,  $J=0.88$ , 7.66 Hz, 1H), 5.58 (spt,  $J=6.65$  Hz, 1H), 3.91 (s, 3H), 1.44 (d,  $J=6.78$  Hz, 6H).  $^{13}\text{C}$  NMR (101 MHz,  $\text{DMSO}-d_6$ )  $\delta$  ppm 161.5, 152.1, 150.6, 146.6, 143.5,

140.0, 139.8, 133.7, 119.5, 118.2, 115.5, 48.3, 39.4, 23.6. HRMS ( $m/z$ ):  $[M + H]^+$  calcd. for  $C_{15}H_{18}N_7O$  312.1567; found: 312.1571. HPLC ( $CH_3CN$  in 0.1% TFA):  $t_R = 1.05$  min (100% purity).

**Compound 8:** *N*-(6-(4-isopropyl-4*H*-1,2,4-triazol-3-yl)pyridin-2-yl)-3-methoxy-1-methyl-1*H*-pyrazole-4-carboxamide

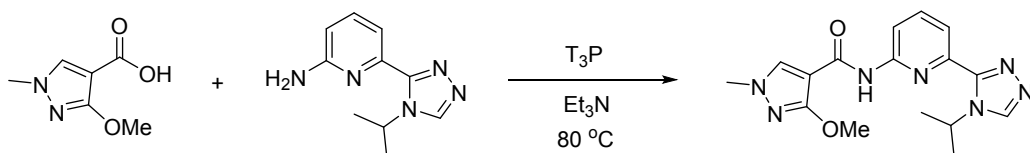

To a mixture of 6-(4-isopropyl-1,2,4-triazol-3-yl)pyridin-2-amine (72 mg, 0.35 mmol) and 3-methoxy-1-methylpyrazole-4-carboxylic acid (55 mg, 0.35 mmol) in a reaction vial was added triethylamine (0.73 mL, 5.3 mmol) and propylphosphonic anhydride ( $\geq 50$  wt% in EtOAc, 0.63 mL). The mixture was heated at  $80\text{ }^\circ C$  for 4 h. After this time the mixture was quenched with a small amount of MeOH ( $\sim 2$  mL) and then it was partitioned between EtOAc and water. The aqueous layer was extracted with EtOAc and the combined organic extracts were dried over  $MgSO_4$ , filtered and concentrated *in vacuo*. The crude product was triturated with MeCN ( $\sim 2$  mL) and dried under vacuum to give the title compound (22 mg, 18%) as a yellow solid.  $^1H$  NMR (500 MHz,  $CD_3OD$ )  $\delta$  ppm 8.85 (s, 1H), 8.34 (d,  $J=7.94$  Hz, 1H), 8.10 – 7.93 (m, 2H), 7.81 (d,  $J=7.94$  Hz, 1H), 5.62 - 5.29 (m, 1H), 4.10 (s, 3H), 3.81 (s, 3H), 1.64 (d,  $J=6.71$  Hz, 6H).  $^1H$  NMR (400 MHz,  $DMSO-d_6$ )  $\delta$  ppm 9.28 (s, 1H), 8.90 (s, 1H), 8.25 - 8.19 (m, 2H), 8.00 (t,  $J=8.03$  Hz, 1H), 7.81 (dd,  $J=0.88, 7.66$  Hz, 1H), 5.33 (spt,  $J=6.73$  Hz, 1H), 4.01 (s, 3H), 3.77 (s, 3H), 1.54 (d,  $J=6.78$  Hz, 6H).  $^{13}C$  NMR (101 MHz,  $DMSO-d_6$ )  $\delta$  ppm 160.0, 159.8, 151.3, 150.4, 146.5, 143.8, 140.4, 136.3, 119.2, 113.7, 101.6, 57.6, 48.9, 39.1, 23.6. HRMS ( $m/z$ ):  $[M + H]^+$  calcd. for  $C_{16}H_{20}N_7O_2$  342.1673; found: 342.1679. HPLC ( $CH_3CN$  in 0.1% TFA):  $t_R = 1.26$  min (100% purity).

**Compound 9:** (*S*)-5<sup>1</sup>,10-Dimethyl-1<sup>4</sup>*H*,5<sup>1</sup>*H*-6-oxa-3-aza-2(2,6)-pyridina-1(3,4)-triazola-5(4,3)-pyrazolacyclodecaphan-4-one

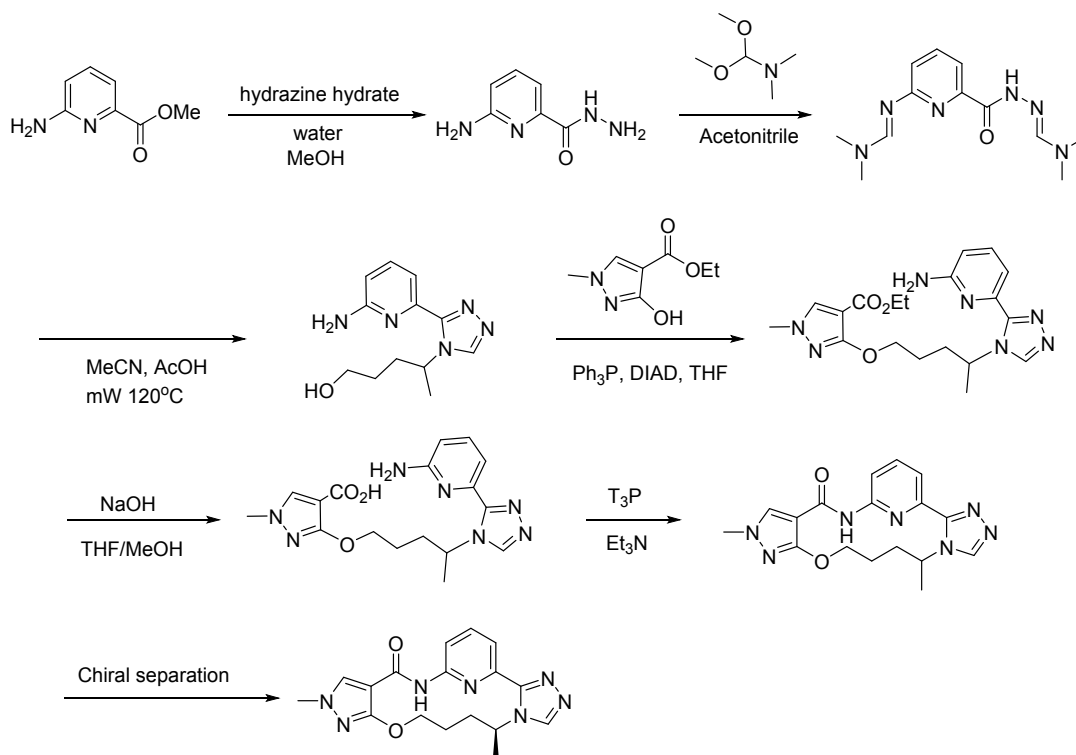

### Step A: 6-Aminopyridinohydrazide

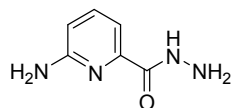

A solution of methyl 6-aminopyridin-3-carboxylate (1.0 g, 6.6 mmol), hydrazine hydrate (2.3 g, 23 mmol, 2.2 mL, 50% purity) in water (3 mL) and MeOH (3 mL) was heated at 100 °C for 2 h. After this time, the volatiles were removed under reduced pressure to afford a white product which was co-evaporated with toluene (40 mL) to give the title compound (980 mg, 98%). MS (ESI): 153.0 [M + H]<sup>+</sup>.

### Step B: (*E*)-*N'*-(6-(2-((*E*)-(Dimethylamino)methylene)hydrazine-1-carbonyl)pyridin-2-yl)-*N,N*-dimethylformimidamide

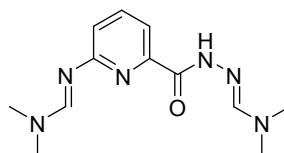

1,1-Dimethoxy-*N,N*-dimethyl-methanamine (2.6 mL, 19.7 mmol) was added to a mixture of 6-aminopyridinohydrazide (1.0 g, 6.6 mmol) in MeCN (10 mL) at rt and the reaction was heated at 75 °C for 4 h. The reaction was cooled to rt and filtered to give the title compound (1.5 g, 87%). MS (ESI): [M + H]<sup>+</sup> calcd. for C<sub>12</sub>H<sub>19</sub>N<sub>6</sub>O 263.3; found 263.0.

**Step C: 4-(3-(6-Aminopyridin-2-yl)-4*H*-1,2,4-triazol-4-yl)pentan-1-ol**

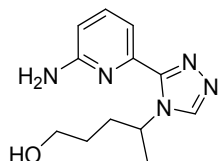

To a mixture of (*E*)-*N'*-(6-(2-((*E*)-(dimethylamino)methylene)hydrazine-1-carbonyl)pyridin-2-yl)-*N,N*-dimethylformimidamide (1.31g, 5mmol) and 4-aminopentan-1-ol (567 mg, 5.5 mmol) in MeCN (12 mL) was added AcOH (4 mL). The mixture was heated with mW irradiation at 120 °C for 2 h (x2). Concentrated and co-evaporated with MeCN (x3), the residue was treated with 1N NaOH to make it pH~9-10. The resulting mixture was concentrated and purified by normal phase column eluted with EtOAc/EtOH 3/1 to get the title compound as an oil (340 mg, 28%). <sup>1</sup>H NMR (400 MHz, CD<sub>3</sub>OD) δ ppm 8.80 - 8.72 (m, 1H), 7.56 (dd, *J*=7.40, 8.41 Hz, 1H), 7.20 (dd, *J*=0.75, 7.28 Hz, 1H), 6.64 (dd, *J*=0.75, 8.28 Hz, 1H), 6.71 - 6.60 (m, 1H), 5.54 - 5.38 (m, 1H), 3.49 (t, *J*=6.40 Hz, 2H), 2.00 - 1.74 (m, 3H), 1.54 (d, *J*=6.78 Hz, 3H), 1.46 - 1.27 (m, 2H). MS (ESI): [M + H]<sup>+</sup> calcd. for C<sub>12</sub>H<sub>18</sub>N<sub>5</sub>O 248.3; found 248.0.

**Step D: Ethyl 3-((4-(3-(6-aminopyridin-2-yl)-4*H*-1,2,4-triazol-4-yl)pentyl)oxy)-1-methyl-1*H*-pyrazole-4-carboxylate**

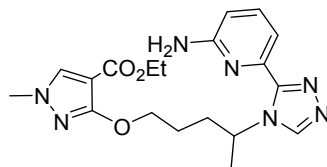

To a mixture of ethyl 3-hydroxy-1-methyl-pyrazole-4-carboxylate (131 mg, 0.77 mmol), 4-[3-(6-amino-2-pyridyl)-1,2,4-triazol-4-yl]pentan-1-ol (190 mg, 0.77 mmol), triphenylphosphine (262 mg, 1 mmol) in THF (2.5 mL) was added DIAD (211 μL, 1.1 mmol). The resulting mixture was stirred at rt overnight. The mixture was loaded onto a normal phase column and eluted with EtOAc/EtOH (3/1) to get the title compound (125 mg, 41%). <sup>1</sup>H NMR

(500 MHz, CD<sub>3</sub>OD)  $\delta$  ppm 8.79 (s, 1H), 7.86 (s, 1H), 7.54 (dd,  $J=7.33, 8.55$  Hz, 1H), 7.19 (d,  $J=7.32$  Hz, 1H), 6.52-6.75 (m, 1H), 5.64 - 5.45 (m, 1H), 4.09-4.29 (m, 4H), 3.71 (s, 3H), 2.15 - 1.95 (m, 2H), 1.78 - 1.65 (m, 2H), 1.54 (d,  $J=6.71$  Hz, 3H), 1.30 - 1.23 (m, 3H). MS (ESI):  $[M + H]^+$  calcd. for C<sub>19</sub>H<sub>26</sub>N<sub>7</sub>O<sub>3</sub> 400.5; found 400.2.

**Step E: 3-((4-(3-(6-Aminopyridin-2-yl)-4H-1,2,4-triazol-4-yl)pentyl)oxy)-1-methyl-1H-pyrazole-4-carboxylic acid**

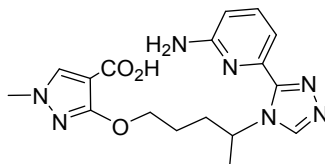

To a solution of ethyl 3-((4-(3-(6-aminopyridin-2-yl)-4H-1,2,4-triazol-4-yl)pentyl)oxy)-1-methyl-1H-pyrazole-4-carboxylate (500 mg, 1.25 mmol) in THF (3 mL) and MeOH (2 mL) was added 1N NaOH (3 mL, 3 mmol). The mixture was heated at 65 °C for 1 h. It was neutralized by adding 1N HCl (3mL), concentrated and lyophilized to give the title compound as a white powder. MS (ESI):  $[M + H]^+$  calcd. for C<sub>17</sub>H<sub>22</sub>N<sub>7</sub>O<sub>3</sub> 372.4; found 372.0.

**Step F: 5<sup>1</sup>,10-Dimethyl-1<sup>4</sup>H,5<sup>1</sup>H-6-oxa-3-aza-2(2,6)-pyridina-1(3,4)-triazola-5(4,3)-pyrazolacyclodecaphan-4-one**

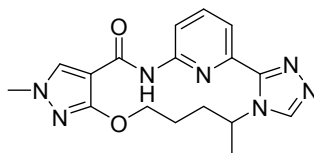

To a mixture of 3-[4-[3-(6-amino-2-pyridyl)-1,2,4-triazol-4-yl]pentoxy]-1-methyl-pyrazole-4-carboxylic acid (394 mg, 1.1 mmol) in triethylamine (3 mL) was added propylphosphonic anhydride ( $\geq 50$  wt% in EtOAc, 3 mL). The mixture was heated with 80 °C for 4 h. The reaction was taken in EtOAc and satd.NaHCO<sub>3</sub>. The aqueous layer was re-extracted with EtOAc (x3). The combined organic phases were concentrated to give 227 mg crude product. The product was then triturated with a small amount of EtOAc/EtOH (3/1) and dried under vacuum to give the title compound as an off-white solid (86 mg, 23%). MS (ESI):  $[M + H]^+$  calcd. for C<sub>17</sub>H<sub>20</sub>N<sub>7</sub>O<sub>2</sub> 354.4; found 354.2.



**Step G: (S)-5<sup>1</sup>,10-Dimethyl-1<sup>4</sup>H,5<sup>1</sup>H-6-oxa-3-aza-2(2,6)-pyridina-1(3,4)-triazola-5(4,3)-pyrazolacyclodecaphan-4-one**

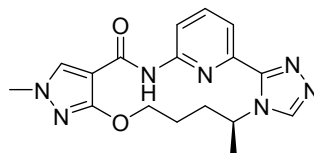

5<sup>1</sup>,10-dimethyl-1<sup>4</sup>H,5<sup>1</sup>H-6-oxa-3-aza-2(2,6)-pyridina-1(3,4)-triazola-5(4,3)-pyrazolacyclodecaphan-4-one (85 mg, 0.24 mmol) was isolated by SFC (using a Chiralpak AD-H 5 $\mu$ m, 30x250mm column and using 30% MeOH in 0.1% Et<sub>2</sub>NH in CO<sub>2</sub> as the mobile phase at a flow rate of 100 mL/min) to give the title compound as an off-white solid (27 mg, 32%, first eluted isomer, stereochemistry arbitrarily assigned). <sup>1</sup>H NMR (500 MHz, CD<sub>3</sub>OD)  $\delta$  ppm 8.82 (s, 1H), 8.03 – 7.90 (m, 2H), 7.80 (ddd,  $J=0.75, 4.14, 7.91$  Hz, 2H), 4.93 - 4.76 (m, 1H), 4.70 - 4.59 (m, 1H), 4.30 - 4.18 (m, 1H), 3.79 (s, 3H), 3.23 - 3.10 (m, 1H), 2.23 - 2.10 (m, 1H), 1.92 - 1.73 (m, 2H), 1.62 (d,  $J=7.03$  Hz, 2H), 1.68 - 1.53 (m, 1H). HRMS ( $m/z$ ): [M + H]<sup>+</sup> calcd. for C<sub>17</sub>H<sub>20</sub>N<sub>7</sub>O<sub>2</sub> 354.1673; found: 354.1679. HPLC (CH<sub>3</sub>CN in 0.1% TFA):  $t_R$  = 1.24 min (100% purity).

**Compound 10: N-(3-(4-Isopropyl-4H-1,2,4-triazol-3-yl)phenyl)-3-methoxy-1-methyl-1H-pyrazole-4-carboxamide**

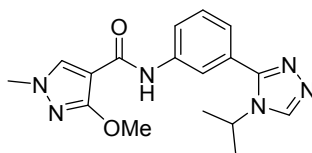

The title compound was synthesized according to the general procedure described in Compound 8 and using 3-(4-isopropyl-4H-1,2,4-triazol-3-yl)aniline to give the title compound (7.8 mg, 11%) as a pale-yellow oil. <sup>1</sup>H NMR (400 MHz, CD<sub>3</sub>OD)  $\delta$  ppm 8.91 - 8.75 (m, 1H), 8.03 (t,  $J=2.01$  Hz, 1H), 7.95 (s, 1H), 7.73 (ddd,  $J=1.00, 2.26, 8.28$  Hz, 1H), 7.55 (t,  $J=7.91$  Hz, 1H), 7.40 - 7.29 (m, 1H), 4.70 - 4.51 (m, 1H), 4.16 - 4.02 (m, 3H), 3.79 (s, 3H), 1.52 (d,  $J=6.78$  Hz, 6H). MS (ESI): [M + H]<sup>+</sup> calcd. for C<sub>17</sub>H<sub>21</sub>N<sub>6</sub>O<sub>2</sub> 341.4; found 341.0.

**Compound 11: N-(6-(1-Isopropyl-1H-imidazol-5-yl)pyridin-2-yl)-3-methoxy-1-methyl-1H-pyrazole-4-carboxamide**

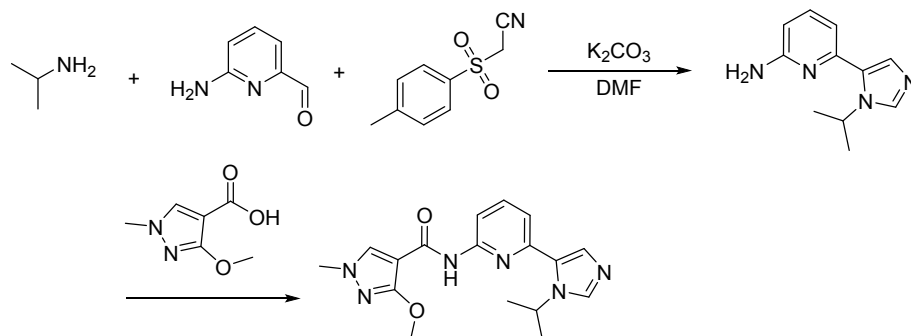

**Step A: 6-(1-Isopropyl-1H-imidazol-5-yl)pyridin-2-amine**

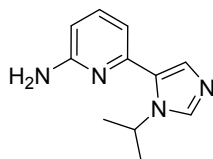

A mixture of propan-2-amine (1.4 mL, 16 mmol), 6-aminopyridine-2-carbaldehyde (997 mg, 8.16 mmol) in DMF (8 mL) was heated to 100 °C for 30 min, resulting in a dark solution. The mixture was brought to rt, and K<sub>2</sub>CO<sub>3</sub> (2.26 g, 16.3 mmol) and TosMIC (1.59 g, 8.16 mmol) was added. The resulting mixture was stirred at 100 °C overnight. The reaction mixture was partitioned between EtOAc and satd.NaHCO<sub>3</sub>. The organic phase was dried over MgSO<sub>4</sub>, filtered and concentrated *in vacuo*. The residue was purified by normal phase column eluted with EtOAc/EtOH (3/1) to give a dark brown solid, which is further purified by trituration with MeCN (5 mL) to get the title compound (402 mg, 24%) as a grey crystalline solid. <sup>1</sup>H NMR (400 MHz, CD<sub>3</sub>OD) δ ppm 7.89 (s, 1H), 7.50 (dd, *J*=8.16, 7.66 Hz, 1H), 7.19 (d, *J*=1.00 Hz, 1H), 6.83 (d, *J*=7.28 Hz, 1H), 6.52 (d, *J*=8.28 Hz, 1H), 5.32 (dt, *J*=13.36, 6.75 Hz, 1H), 1.49 (d, *J*=6.78 Hz, 6H). MS (ESI): [M + H]<sup>+</sup> calcd. for C<sub>11</sub>H<sub>15</sub>N<sub>4</sub> 203.3; found 203.0.

**Step B: N-(6-(1-Isopropyl-1H-imidazol-5-yl)pyridin-2-yl)-3-methoxy-1-methyl-1H-pyrazole-4-carboxamide**

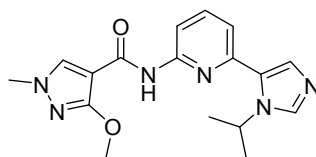

The title compound was synthesized according to the general procedure described in Compound 8 and using 6-(1-isopropyl-1*H*-imidazol-5-yl)pyridin-2-amine to give the title compound (80 mg, 29%) as an off-white solid. <sup>1</sup>H NMR (400 MHz, CD<sub>3</sub>OD) δ ppm 8.13 (d, *J*=8.28 Hz, 1H), 8.06 - 7.95 (m, 2H), 7.84 (t, *J*=8.03 Hz, 1H), 7.54 - 7.35 (m, 2H), 5.49 - 5.31 (m, 1H), 4.12 (s, 3H), 3.83 (s, 3H), 1.62 (d, *J*=6.78 Hz, 6H). <sup>1</sup>H NMR (400 MHz, DMSO-*d*<sub>6</sub>) δ ppm 9.18 (s, 1H), 8.21 (s, 1H), 8.04 - 7.98 (m, 2H), 7.84 (t, *J*=7.91 Hz, 1H), 7.45 - 7.40 (m, 2H), 5.29 (quin, *J*=6.71 Hz, 1H), 4.01 (s, 3H), 3.76 (s, 3H), 1.52 (d, *J*=6.78 Hz, 6H). <sup>13</sup>C NMR (101 MHz, DMSO-*d*<sub>6</sub>) δ ppm 159.4, 159.2, 150.6, 148.6, 139.4, 137.4, 135.7, 130.3, 129.6, 117.2, 110.4, 101.2, 57.1, 47.7, 39.1, 23.5. HRMS (*m/z*): [M + H]<sup>+</sup> calcd. for C<sub>17</sub>H<sub>21</sub>N<sub>6</sub>O<sub>2</sub> 341.1721; found: 341.1731. HPLC (CH<sub>3</sub>CN in 0.1% TFA): *t*<sub>R</sub> = 1.19 min (100% purity).

**Compound 12: 1-Ethyl-*N*-(6-(4-isopropyl-4*H*-1,2,4-triazol-3-yl)pyridin-2-yl)-3-methoxy-1*H*-pyrazole-4-carboxamide**

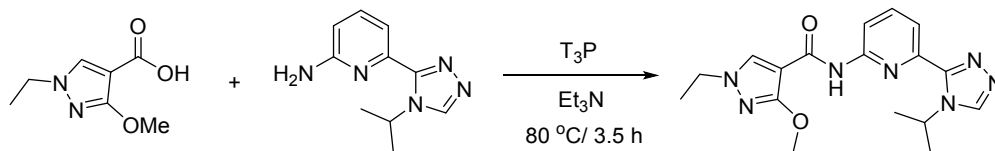

To a mixture of 6-(4-isopropyl-1,2,4-triazol-3-yl)pyridin-2-amine (102 mg, 0.5 mmol) and 1-ethyl-3-methoxy-pyrazole-4-carboxylic acid (85 mg, 0.5 mmol) in a reaction vial was added triethylamine (1 mL, 7.21 mmol) and propylphosphonic anhydride (≥50 wt% in EtOAc, 1 mL). The mixture was heated at 80 °C for 3.5 h. After this time the mixture was quenched with a small amount of MeOH (~ 2 mL) and then it was partitioned between EtOAc and water. The aqueous layer was extracted with EtOAc and the combined organic extracts were dried over MgSO<sub>4</sub>, filtered and concentrated *in vacuo*. The crude product was triturated with MeCN (~ 2 mL) to give the title compound (13 mg, 7%) as a pale brown solid. <sup>1</sup>H NMR (400 MHz, CD<sub>3</sub>OD) δ ppm 8.85 (s, 1H), 8.34 (d, *J*=8.28 Hz, 1H), 8.06 (s, 1H), 7.98 (t, *J*=8.03 Hz, 1H), 7.81 (d, *J*=7.28 Hz, 1H), 5.44 (quin, *J*=6.78 Hz, 1H), 4.17 - 3.95 (m, 5H), 1.64 (d, *J*=6.78 Hz, 6H), 1.46 (t, *J*=7.28 Hz, 3H). <sup>1</sup>H NMR (400 MHz, DMSO-*d*<sub>6</sub>) δ ppm 9.30 (s, 1H), 8.90 (s, 1H), 8.27 (s, 1H), 8.22 (dd, *J*=0.88, 8.41 Hz, 1H), 8.00 (t, *J*=7.91 Hz, 1H), 7.80 (dd, *J*=0.88, 7.66 Hz, 1H), 5.33 (spt, *J*=6.73 Hz, 1H), 4.10 - 3.97 (m, 5H), 1.54 (d, *J*=6.78 Hz, 6H), 1.37 (t, *J*=7.15 Hz, 3H). <sup>13</sup>C NMR (101 MHz, DMSO-*d*<sub>6</sub>) δ ppm 159.6, 159.2, 150.8, 149.9, 146.0, 143.3, 139.9, 134.3, 118.7, 113.2, 101.0, 57.0, 48.4,

46.8, 23.0, 14.8. HRMS ( $m/z$ ):  $[M + H]^+$  calcd. for  $C_{17}H_{22}N_7O_2$  356.1829; found: 356.1829. HPLC ( $CH_3CN$  in 0.1% TFA):  $t_R = 1.44$  min (100% purity).

**Compound 13: 1-(Cyclopropylmethyl)-*N*-(6-(4-isopropyl-4*H*-1,2,4-triazol-3-yl)pyridin-2-yl)-3-methoxy-1*H*-pyrazole-4-carboxamide**

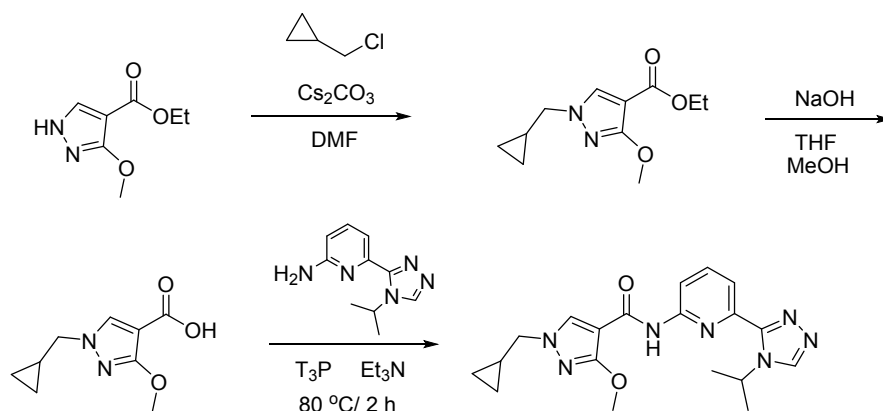

**Step A: Ethyl 1-(cyclopropylmethyl)-3-methoxy-1*H*-pyrazole-4-carboxylate**

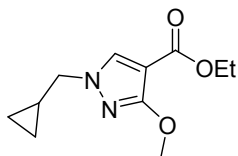

A mixture of ethyl 3-methoxy-1*H*-pyrazole-4-carboxylate (190 mg, 1.0 mmol), (chloromethyl)cyclopropane (136 mg, 1.5 mmol) and  $Cs_2CO_3$  (326 mg, 1.0 mmol) in DMF (2 mL) was heated in a reaction vial at 80 °C for 1 h. The mixture was partitioned between EtOAc and water. The aqueous layer was extracted with EtOAc. The combined organic phases were dried over  $MgSO_4$ , filtered and concentrated. The residue was purified by normal phase column eluted with 30-40% EtOAc in heptane to give the title intermediate (180 mg, 80%) as a white solid. MS (ESI):  $[M + H]^+$  calcd. for  $C_{11}H_{17}N_2O_3$  225.3; found 225.1.

**Step B: 1-(Cyclopropylmethyl)-3-methoxy-1*H*-pyrazole-4-carboxylic acid**

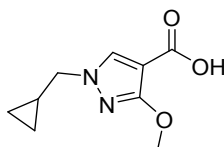

To a solution of ethyl 1-(cyclopropylmethyl)-3-methoxy-1*H*-pyrazole-4-carboxylate (178 mg, 0.79 mmol) in THF (1.5 mL) and MeOH (1.5 mL) was added 1N NaOH (1.5 mL). The mixture was heated at 60°C for 2 h. The mixture was acidified with 1N HCl (2 mL) and then it was partitioned between EtOAc and water. The organic phase was separated, dried over MgSO<sub>4</sub>, filtered and concentrated to give the title intermediate as a white solid (146 mg, 94%). MS (ESI): [M + H]<sup>+</sup> calcd. for C<sub>9</sub>H<sub>13</sub>N<sub>2</sub>O<sub>3</sub> 197.2; found 197.1.

**Step C: 1-(Cyclopropylmethyl)-*N*-(6-(4-isopropyl-4*H*-1,2,4-triazol-3-yl)pyridin-2-yl)-3-methoxy-1*H*-pyrazole-4-carboxamide**

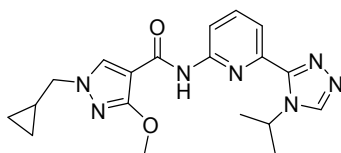

To a mixture of 6-(4-isopropyl-1,2,4-triazol-3-yl)pyridin-2-amine (61 mg, 0.3 mmol) and 1-(cyclopropylmethyl)-3-methoxy-pyrazole-4-carboxylic acid (59 mg, 0.3 mmol) in a reaction vial was added triethylamine (1.1 mL, 7.91 mmol) and propylphosphonic anhydride (≥50 wt% in EtOAc, 0.8 mL). The mixture was heated at 80 °C for 2 h. After this time the mixture was quenched with a small amount of MeOH (~ 0.5 mL) and partitioned between EtOAc and water. The aqueous layer was extracted with EtOAc and the combined organic extracts were dried over MgSO<sub>4</sub>, filtered and concentrated *in vacuo*. The residue was purified by normal phase column (eluted with 100% EtOAc to EtOAc/EtOH 3/1) to give the title compound as a pale yellow solid (24 mg, 21%). <sup>1</sup>H NMR (400 MHz, CD<sub>3</sub>OD) δ ppm 8.85 (s, 1H), 8.34 (d, *J*=8.03 Hz, 1H), 8.11 (s, 1H), 7.97 (t, *J*=7.91 Hz, 1H), 7.81 (d, *J*=7.28 Hz, 1H), 5.44 (dt, *J*=13.36, 6.75 Hz, 1H), 4.11 (s, 3H), 3.98 - 3.86 (m, 2H), 1.69 - 1.60 (m, 6H), 1.41 - 1.19 (m, 1H), 0.81 - 0.51 (m, 2H), 0.50 - 0.19 (m, 2H). <sup>1</sup>H NMR (400 MHz, DMSO-*d*<sub>6</sub>) δ ppm 9.31 (s, 1H), 8.90 (s, 1H), 8.28 (s, 1H), 8.23 (dd, *J*=0.75, 8.28 Hz, 1H), 8.00 (t, *J*=7.91 Hz, 1H), 7.81 (dd, *J*=0.75, 7.53 Hz, 1H), 5.34 (quin, *J*=6.71 Hz, 1H), 4.03 (s, 3H), 3.88 (d, *J*=7.28 Hz, 2H), 1.54 (d, *J*=6.53 Hz, 6H), 1.33 - 1.20 (m, 1H), 0.59 - 0.48 (m, 2H), 0.43 - 0.31 (m, 2H). <sup>13</sup>C NMR (101 MHz, DMSO-*d*<sub>6</sub>) δ ppm 159.6, 159.2, 150.8, 149.9, 143.3, 146.0, 139.9, 134.5, 118.7, 113.2, 101.1, 57.1, 56.1, 48.4, 23.0, 10.1, 3.5. HRMS (*m/z*): [M + H]<sup>+</sup> calcd. for C<sub>19</sub>H<sub>24</sub>N<sub>7</sub>O<sub>2</sub> 382.1986; found: 382.1983. HPLC (CH<sub>3</sub>CN in 0.1% TFA): *t*<sub>R</sub> = 1.64 min (100% purity).

**Compound 14: N-(6-(4-Isopropyl-4H-1,2,4-triazol-3-yl)pyridin-2-yl)-3-methoxy-1-(2-methoxyethyl)-1H-pyrazole-4-carboxamide**

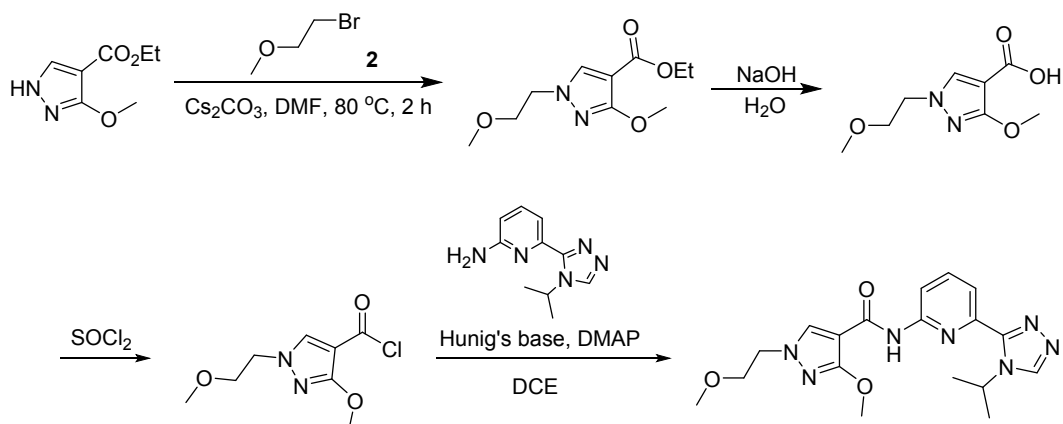

**Step A: Ethyl 3-methoxy-1-(2-methoxyethyl)-1H-pyrazole-4-carboxylate**

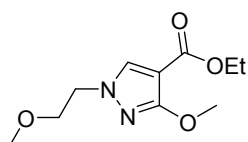

To a solution of ethyl 3-methoxy-1H-pyrazole-4-carboxylate (30 g, 176 mmol) in DMF (350 mL) was added 1-bromo-2-methoxyethane (31.8 g, 229 mmol) and Cs<sub>2</sub>CO<sub>3</sub> (57.4 g, 176 mmol). The mixture was stirred at 80 °C for 2 h. The mixture was concentrated *in vacuo*. The residue was taken into EtOAc (300 ml x 3) and brine. The combined organic phases were washed with sat. NaCl (500 ml x 2), dried over Na<sub>2</sub>SO<sub>4</sub>, filtered and concentrated *in vacuo* to give a residue which was purified by column chromatography on silica gel (PE:EA = 4:1 to 1:1) to give the title compound (28 g, 70%) as yellow oil. <sup>1</sup>HNMR (400 MHz, CD<sub>3</sub>OD) δ ppm 7.90 (s, 1H), 4.21 (q, *J* = 7.2 Hz, 2H), 4.15 - 4.11 (m, 2H), 3.91 (s, 3H), 3.70 (t, *J* = 4.8 Hz, 2H), 3.31 (s, 3H), 1.29 (t, *J* = 6.8 Hz, 3H).

**Step B: 3-Methoxy-1-(2-methoxyethyl)-1H-pyrazole-4-carboxylic acid**

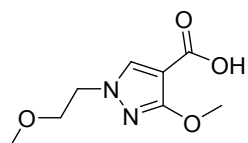

A solution of NaOH (9.8 g, 245.3 mmol) in H<sub>2</sub>O (300 mL) was added to ethyl 3-methoxy-1-

(2-methoxyethyl)-1*H*-pyrazole-4-carboxylate (28 g, 122.6 mmol) and heated at 100 °C for 2 h. The mixture was acidified with 2N HCl (30 ml) and extracted with DCM/MeOH (500 ml/50 ml x 3). The organic phases were dried over Na<sub>2</sub>SO<sub>4</sub> and filtered. The filtrate was concentrated *in vacuo* to give the title compound (15 g, 61%) as a white solid. <sup>1</sup>H NMR (400 MHz, DMSO-*d*<sub>6</sub>) δ ppm 11.94 (s, 1H), 8.00 (s, 1H), 4.12 (t, *J* = 5.2 Hz, 2H), 3.82 (s, 3H), 3.65 (t, *J* = 5.2 Hz, 2H), 3.24 (s, 3H). MS (ESI): [M + H]<sup>+</sup> calcd. for C<sub>8</sub>H<sub>13</sub>N<sub>2</sub>O<sub>4</sub> 201.2; found 201.0.

**Step C: N-(6-(4-Isopropyl-4*H*-1,2,4-triazol-3-yl)pyridin-2-yl)-3-methoxy-1-(2-methoxyethyl)-1*H*-pyrazole-4-carboxamide**

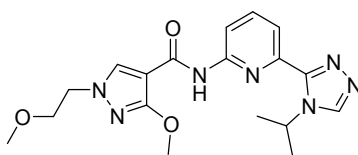

The mixture of 3-methoxy-1-(2-methoxyethyl)pyrazole-4-carboxylic acid (81.00 mg, 0.40 mmol) in thionyl chloride (0.5 mL, 6.85 mmol) was heated at 80 °C for 5 min. The mixture was concentrated and co-evaporated with MeCN to get the crude intermediate (85 mg, 98%).

To a mixture of the above acid chloride (85 mg, 0.39 mmol), 6-(4-isopropyl-4*H*-1,2,4-triazol-3-yl)pyridin-2-amine (80 mg, 0.39 mmol) and DMAP (48 mg, 0.39 mmol) in DCE (1.00 mL) was added Hunig's base (340 μL, 1.94 mmol). The mixture was stirred at rt overnight and partitioned between EtOAc/sat. NaHCO<sub>3</sub>. The aqueous layer was extracted with EtOAc (x3). The combined organic phases were dried over MgSO<sub>4</sub>, filtered and evaporated *in vacuo*. The residue was purified by column chromatography using EtOAc/EtOH (3/1) as eluent to give the title compound (35 mg, 23%) as a white powder after lyophilization. <sup>1</sup>H NMR (400 MHz, CD<sub>3</sub>OD) δ ppm 8.85 (s, 1H), 8.42 - 8.28 (m, 1H), 8.06 (s, 1H), 8.04 - 7.92 (m, 1H), 7.81 (d, *J* = 7.28 Hz, 1H), 5.64 - 5.25 (m, 1H), 4.20 (t, *J* = 5.02 Hz, 2H), 4.11 (s, 3H), 3.74 (t, *J* = 5.02 Hz, 2H), 3.34 (s, 3H), 1.64 (d, *J* = 6.78 Hz, 6H). <sup>1</sup>H NMR (400 MHz, DMSO-*d*<sub>6</sub>) δ ppm 9.30 (s, 1H), 8.90 (s, 1H), 8.25 - 8.19 (m, 2H), 8.00 (t, *J* = 7.91 Hz, 1H), 7.81 (dd, *J* = 0.88, 7.66 Hz, 1H), 5.34 (spt, *J* = 6.65 Hz, 1H), 4.19 (t, *J* = 5.27 Hz, 2H), 4.05 - 3.98 (m, 3H), 3.68 (t, *J* = 5.27 Hz, 2H), 3.25 (s, 3H), 1.54 (d, *J* = 6.53 Hz, 6H). <sup>13</sup>C NMR (101 MHz, DMSO-*d*<sub>6</sub>) δ ppm 160.1, 159.8, 151.2, 150.4, 146.5, 143.8, 140.4, 136.2, 119.3, 113.7, 101.7, 70.0, 58.4, 57.6, 52.1, 48.9, 23.6; HRMS (*m/z*): [M + H]<sup>+</sup> calcd. for

C<sub>18</sub>H<sub>24</sub>N<sub>7</sub>O<sub>3</sub> 386.1935; found: 386.1943. HPLC (CH<sub>3</sub>CN in 0.1% TFA):  $t_R$  = 1.37 min (95% purity).

**Compound 15:** *N*-(6-(4-Isopropyl-4*H*-1,2,4-triazol-3-yl)pyridin-2-yl)-3-methoxy-1-(pyridin-2-yl)-1*H*-pyrazole-4-carboxamide

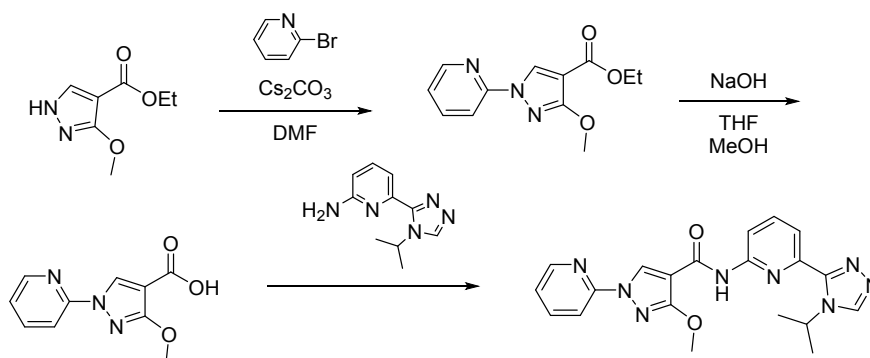

**Step A: Ethyl 3-methoxy-1-(pyridin-2-yl)-1*H*-pyrazole-4-carboxylate**

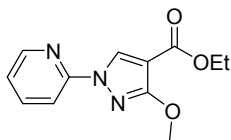

A mixture ethyl 3-methoxy-1*H*-pyrazole-4-carboxylate (170 mg, 1.0 mmol), 2-bromopyridine (174 mg, 1.1 mmol) and Cs<sub>2</sub>CO<sub>3</sub> (326 mg, 1.0 mmol) in DMF (1 mL) was heated in a sealed tube at 120 °C overnight. The mixture was partitioned between EtOAc and water. The aqueous layer was extracted with EtOAc. The combined organic phases were dried over MgSO<sub>4</sub>, filtered and concentrated. The residue was purified by column chromatography eluting with 10-20% EtOAc in heptane to give the title intermediate (36 mg, 15%) as a white solid. MS (ESI): [M + H]<sup>+</sup> calcd. for C<sub>12</sub>H<sub>14</sub>N<sub>3</sub>O<sub>3</sub> 248.3; found 248.1.

**Step B: 3-Methoxy-1-(pyridin-2-yl)-1*H*-pyrazole-4-carboxylic acid**

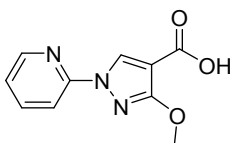



To ethyl 3-methoxy-1-(2-pyridyl)pyrazole-4-carboxylate (35.8 mg, 0.145 mmol) in THF (0.5 mL) and MeOH (0.5 mL) was added 1N sodium hydroxide (0.3 mL, 0.3 mmol) in a reaction vial. The reaction mixture was heated at 60 °C for 1.5 h. The mixture was acidified by 1N HCl, concentrated to give a solid which was used without further purification in the next step.

**Step C: *N*-(6-(4-Isopropyl-4*H*-1,2,4-triazol-3-yl)pyridin-2-yl)-3-methoxy-1-(pyridin-2-yl)-1*H*-pyrazole-4-carboxamide**

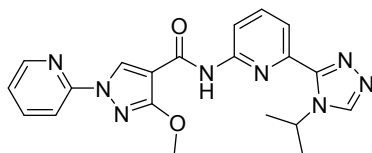

To a mixture of 6-(4-isopropyl-1,2,4-triazol-3-yl)pyridin-2-amine (30 mg, 0.15 mmol) and 3-methoxy-1-(2-pyridyl)pyrazole-4-carboxylic acid (32 mg, 0.15 mmol) in a reaction vial was added triethylamine (0.5 mL, 3.61 mmol) and propylphosphonic anhydride ( $\geq 50$  wt% in EtOAc, 0.5 mL). The mixture was heated at 80 °C for 1.5 h and quenched with MeOH and water. The suspension was filtered and washed with water, EtOAc, and MeOH to give the title compound (9 mg, 15%) as a white solid.  $^1\text{H}$  NMR (400 MHz,  $\text{CD}_3\text{OD}$ )  $\delta$  ppm 10.47 (s, 1H), 9.87 (s, 1H), 9.72 (s, 1H), 9.34 (d,  $J=3.76$  Hz, 1H), 9.06 (d,  $J=8.03$  Hz, 1H), 8.97 - 8.77 (m, 2H), 8.67 (t,  $J=8.78$  Hz, 2H), 8.23 (dd,  $J=6.78, 5.02$  Hz, 1H), 6.46 - 5.94 (m, 1H), 4.96 (s, 3H), 2.35 (d,  $J=6.53$  Hz, 6H). HRMS ( $m/z$ ):  $[\text{M} + \text{H}]^+$  calcd. for  $\text{C}_{20}\text{H}_{21}\text{N}_8\text{O}_2$  405.1782; found: 405.1783. HPLC ( $\text{CH}_3\text{CN}$  in 0.1% TFA):  $t_R = 1.78$  min (95% purity).

**Compound 16: *N*-(6-(4-Isopropyl-4*H*-1,2,4-triazol-3-yl)pyridin-2-yl)-3-methoxy-1-(pyridin-4-yl)-1*H*-pyrazole-4-carboxamide**

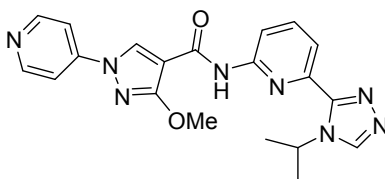

The title compound was synthesized according to the general procedure described in Compound 15 and using 4-chloropyridine (236 mg). The final product was purified by trituration

with MeOH (20 ml) to give the title compound (120 mg, 65% for the last two steps) as a gray solid. <sup>1</sup>H NMR (600 MHz, DMSO-*d*<sub>6</sub>) δ ppm 9.57 (s, 1H), 9.35 (s, 1H), 8.87 (s, 1H), 8.69 - 8.63 (m, 2H), 8.24 (d, *J*=8.25 Hz, 1H), 8.04 (t, *J*=7.98 Hz, 1H), 7.93 - 7.88 (m, 2H), 7.85 (dd, *J*=0.73, 7.52 Hz, 1H), 5.43 (dt, *J*=6.69, 13.39 Hz, 1H), 4.16 (s, 3H), 1.54 (d, *J*=6.79 Hz, 6H). <sup>13</sup>C NMR (151 MHz, DMSO-*d*<sub>6</sub>) δ ppm 161.0, 158.8, 151.0, 150.5, 149.8, 146.1, 144.6, 143.1, 139.8, 133.4, 119.0, 113.5, 111.7, 106.3, 57.3, 48.2, 23.0. HRMS (*m/z*): [M + H]<sup>+</sup> calcd. for C<sub>20</sub>H<sub>21</sub>N<sub>8</sub>O<sub>2</sub> 405.1782; found: 405.1780. HPLC (CH<sub>3</sub>CN in 0.1% TFA): *t*<sub>R</sub> = 1.10 min (100% purity).

**Compound 17: *N*-(6-(4-Isopropyl-4*H*-1,2,4-triazol-3-yl)pyridin-2-yl)-3-methoxy-1-pyridin-3-yl)-1*H*-pyrazole-4-carboxamide**

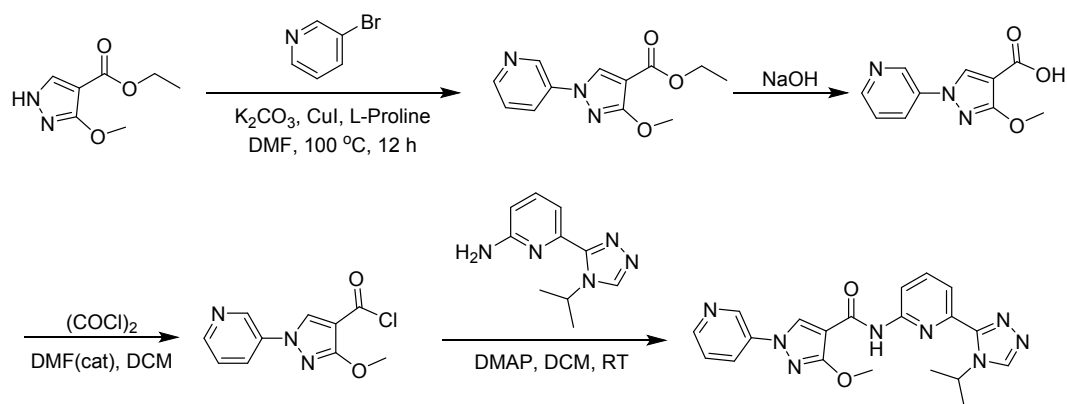

**Step A: Ethyl 3-methoxy-1-(3-pyridin-2-yl)-1*H*-pyrazole-4-carboxylate**

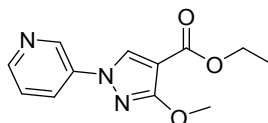

A solution of ethyl 3-methoxy-1*H*-pyrazole-4-carboxylate (2 g, 11.8 mmol), 3-bromopyridine (2.79 g, 17.6 mmol), *L*-proline (270 mg, 2.36 mmol), CuI (224 mg, 1.18 mmol) and K<sub>2</sub>CO<sub>3</sub> (4.06 g, 29.4 mmol) in DMF (30 mL) was stirred at 100 °C under N<sub>2</sub> for 17 h. After this time the mixture was diluted with H<sub>2</sub>O (100 mL) and extracted with EtOAc (50 mL x 3). The combined organic layers were dried over Na<sub>2</sub>SO<sub>4</sub>, filtered and concentrated *in vacuo* to give a crude residue which was purified by HPLC (using a Phenomenex Synergi C18 4μm, 150x30mm column and using water (containing 0.05% HCl) and MeCN from 16 to 36% as the mobile phase

at a flow rate of 25 mL/min) to give the title compound (600 mg, 21%) as a white solid. MS (ESI):  $[M + H]^+$  calcd. for  $C_{12}H_{14}N_3O_3$  248.3; found 248.0.

**Step B: 3-Methoxy-1-(pyridin-3-yl)-1H-pyrazole-4-carboxylic acid**

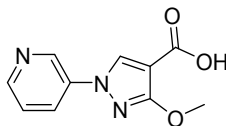

A mixture of ethyl 3-methoxy-1-(pyridin-3-yl)-1H-pyrazole-4-carboxylate (500 mg, 2.0 mmol) and NaOH (243 mg, 6.1 mmol) in MeOH/H<sub>2</sub>O (6 mL, 5/1) was heated at 50 °C for 3 h. After this time, the mixture was concentrated *in vacuo* and diluted with water (10 mL). The pH of the mixture was adjusted to 3-4 by addition of aqueous HCl (3M) and then it was extracted with EtOAc (300 mL x 3). The combined organic layers were dried over Na<sub>2</sub>SO<sub>4</sub>, filtered and concentrated to give the title compound (300 mg, 68%) as a white solid.

**Step C: 3-Methoxy-1-(pyridin-3-yl)-1H-pyrazole-4-carbonyl chloride**

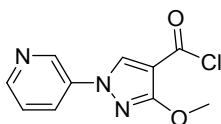

To a solution of 3-methoxy-1-(pyridin-3-yl)-1H-pyrazole-4-carboxylic acid (150 mg, 0.68 mmol) in DCM (10 mL) under N<sub>2</sub> was added (COCl)<sub>2</sub> (174 mg, 1.37 mmol) followed by DMF (5 drops) and the mixture was stirred at 25 °C for 2 h. After this time the mixture was concentrated under reduced pressure to give the title compound (162 mg, crude) which was used without further purification in the next step.

**Step D: N-(6-(4-Isopropyl-4H-1,2,4-triazol-3-yl)pyridin-2-yl)-3-methoxy-1-(pyridin-3-yl)-1H-pyrazole-4-carboxamide**

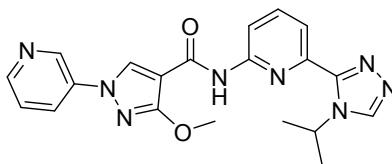

To a solution of 3-methoxy-1-(pyridin-3-yl)-1*H*-pyrazole-4-carbonyl chloride (162 mg, 0.68 mmol) and 6-(4-isopropyl-4*H*-1,2,4-triazol-3-yl)pyridin-2-amine (277 mg, 1.36 mmol) in DCM (10 mL) under a N<sub>2</sub> atmosphere was added DMAP (166 mg, 1.36 mmol) and the mixture was stirred at 25 °C for 17 h. After this time the mixture was concentrated *in vacuo* and purified by prep-HPLC (using a Waters Xbridge Prep OBD C18 5μm, 150x30mm column and using water (containing 0.05% NH<sub>3</sub>·H<sub>2</sub>O) and MeCN, from 20 to 50% as the mobile phase at a flow rate of 25 mL/min) to give the title compound (29 mg, 5%) as a white solid. <sup>1</sup>H NMR (400 MHz, DMSO-*d*<sub>6</sub>) δ ppm 9.46 (s, 1H), 9.19 - 9.16 (m, 1H), 9.13 (d, *J*=2.2 Hz, 1H), 8.90 (s, 1H), 8.53 (d, *J*=3.9 Hz, 1H), 8.30 - 8.20 (m, 2H), 8.02 (t, *J*=7.9 Hz, 1H), 7.83 (d, *J*=7.5 Hz, 1H), 7.55 (dd, *J*=4.6, 8.1 Hz, 1H), 5.45 - 5.25 (m, 1H), 4.14 (s, 3H), 1.53 (d, *J*=6.6 Hz, 6H). <sup>1</sup>H NMR (400 MHz, DMSO-*d*<sub>6</sub>) δ ppm 9.47 (s, 1H), 9.18 (s, 1H), 9.15 (d, *J*=2.76 Hz, 1H), 8.91 (s, 1H), 8.54 (dd, *J*=1.38, 4.64 Hz, 1H), 8.30 - 8.23 (m, 2H), 8.04 (t, *J*=8.03 Hz, 1H), 7.84 (dd, *J*=0.88, 7.65 Hz, 1H), 7.59 - 7.54 (m, 1H), 5.38 (spt, *J*=6.69 Hz, 1H), 4.16 (s, 3H), 1.55 (d, *J*=6.78 Hz, 6H). <sup>13</sup>C NMR (101 MHz, DMSO-*d*<sub>6</sub>) δ ppm 161.3, 159.6, 151.1, 150.4, 148.0, 146.6, 143.8, 140.5, 140.2, 135.7, 133.7, 126.0, 124.7, 119.6, 113.9, 105.8, 58.0, 48.9, 23.6. HRMS (*m/z*): [M + H]<sup>+</sup> calcd. for C<sub>20</sub>H<sub>21</sub>N<sub>8</sub>O<sub>2</sub> 405.1782; found: 405.1782. HPLC (CH<sub>3</sub>CN in 0.1% TFA): *t*<sub>R</sub> = 1.25 min (98% purity).

**Compound 18: 1-(5-Cyclopropylpyridin-3-yl)-*N*-(6-(4-isopropyl-4*H*-1,2,4-triazol-3-yl)pyridin-2-yl)-3-methoxy-1*H*-pyrazole-4-carboxamide**

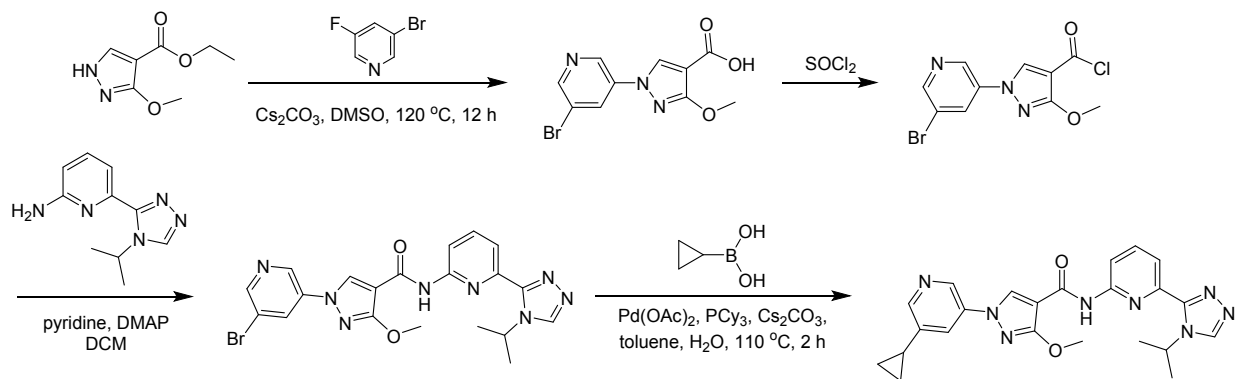

**Step A: 1-(5-Bromopyridin-3-yl)-3-methoxy-1*H*-pyrazole-4-carboxylic acid**

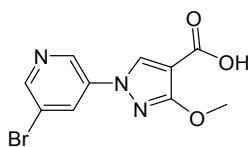

To a solution of ethyl 3-methoxy-1*H*-pyrazole-4-carboxylate (10 g, 59 mmol) in DMSO (100 mL) was added Cs<sub>2</sub>CO<sub>3</sub> (58.6 g, 0.18 mol) and 3-bromo-5-fluoropyridine (10.3 g, 59 mmol). The mixture was stirred at 120 °C for 18 h. The mixture was poured into water (500 mL) and adjusted to pH~3 with 2N HCl. The resulting solids were filtered off and lyophilized to give the title compound (10 g, 57%) as a yellow solid. <sup>1</sup>H NMR (400 MHz, DMSO-*d*<sub>6</sub>) δ ppm 12.53 (br s, 1H), 9.11 (s, 1H), 9.04 (s, 1H), 8.64 (s, 1H), 8.54 (d, *J* = 1.6 Hz, 1H), 3.98 (s, 3H).

**Step B: 1-(5-Bromopyridin-3-yl)-3-methoxy-1*H*-pyrazole-4-carbonyl chloride**

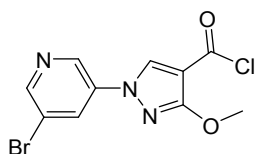

A mixture of 1-(5-bromopyridin-3-yl)-3-methoxy-1*H*-pyrazole-4-carboxylic acid (9.5 g, 3.1 mmol) in SOCl<sub>2</sub> (90 mL) was heated at 60 °C for 2 h, and concentrated under vacuum to give the crude title compound (10g, crude) as an off-white solid. HPLC samples were prepared in methanol giving the mass of the corresponding methyl ester.

**Step C: 1-(5-Bromopyridin-3-yl)-*N*-(6-(4-isopropyl-4*H*-1,2,4-triazol-3-yl)pyridin-2-yl)-3-methoxy-1*H*-pyrazole-4-carboxamide**

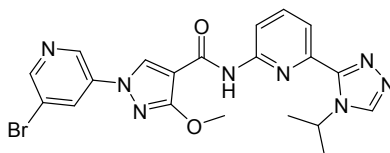

To a solution of 1-(5-bromopyridin-3-yl)-3-methoxy-1*H*-pyrazole-4-carbonyl chloride (10 g, crude, 3.1 mmol) in DCM (120 mL) was added 6-(4-isopropyl-4*H*-1,2,4-triazol-3-yl)pyridin-2-amine (6.3 g, 3.1 mmol). Pyridine (10 mL) was added to adjust to pH~8. DMAP (7.6 g, 6.2 mmol) was added and the resulting mixture was stirred at 29 °C for 0.5 h. A precipitate formed which was filtered off and washed several times with water and MeOH. After lyophilization the title compound (12 g, 80%, two steps) was obtained as a white solid. <sup>1</sup>H NMR (400 MHz, DMSO-*d*<sub>6</sub>) δ ppm 9.20 (s, 1H), 8.89 (d, *J* = 2.0 Hz, 1H), 8.62 (d, *J* = 2.0 Hz, 1H), 8.49 (s, 1H), 8.39 - 8.36 (m, 2H), 8.22 (t, *J* = 2.0 Hz, 1H), 8.01 (d, *J* = 7.6 Hz, 1H), 7.92 - 7.89 (m, 1H), 5.51 - 5.47 (m, 1H), 4.22 (s, 3H), 1.63 (d, *J* = 6.8 Hz, 6H).

**Step D: 1-(5-Cyclopropylpyridin-3-yl)-N-(6-(4-isopropyl-4H-1,2,4-triazol-3-yl)pyridin-2-yl)-3-methoxy-1H-pyrazole-4-carboxamide**

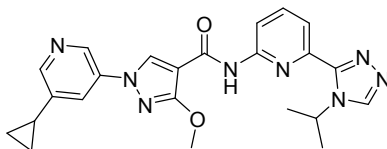

To a solution of 1-(5-bromopyridin-3-yl)-N-(6-(4-isopropyl-4H-1,2,4-triazol-3-yl)pyridin-2-yl)-3-methoxy-1H-pyrazole-4-carboxamide (100 mg, 0.2 mmol) in toluene/water (10 mL, 10:1) was added cyclopropylboronic acid (106.6 mg, 1.24 mmol), PCy<sub>3</sub> (58 mg, 0.2 mmol), Cs<sub>2</sub>CO<sub>3</sub> (404.4 mg, 1.24 mmol). Pd(OAc)<sub>2</sub> (23.2 mg, 0.1 mmol) was added under N<sub>2</sub> and the resulting mixture was heated at 110 °C for 2 h. The mixture was concentrated and purified by HPLC (using a Waters Xbridge Prep OBD C18 150 x 30mm x 5µm column, and using water (0.05% ammonia hydroxide v/v)-MeCN as mobile phase, from 30-60% at a flow rate of 25 mL/min) to give the title compound (46.3 mg, 50%). <sup>1</sup>H NMR (400 MHz, DMSO-*d*<sub>6</sub>) δ ppm 9.42 (s, 1H), 9.18 (s, 1H), 8.94 - 8.84 (m, 2H), 8.37 (s, 1H), 8.24 (d, *J* = 8.4 Hz, 1H), 8.02 (t, *J* = 8 Hz, 1H), 7.88 - 7.80 (m, 2H), 5.36 (m, 1H), 4.14 (s, 3H), 2.10 - 1.97 (m, 1H), 1.55 (d, *J* = 6.6 Hz, 6H), 1.12 - 0.97 (m, 2H), 0.89 (d, *J* = 3.6 Hz, 2H). <sup>1</sup>H NMR (400 MHz, DMSO-*d*<sub>6</sub>) δ ppm 9.44 (s, 1H), 9.20 (s, 1H), 8.91 (s, 1H), 8.89 (d, *J* = 2.51 Hz, 1H), 8.39 (d, *J* = 1.76 Hz, 1H), 8.25 (dd, *J* = 1.00, 8.28 Hz, 1H), 8.03 (t, *J* = 8.03 Hz, 1H), 7.88 - 7.82 (m, 2H), 5.37 (quin, *J* = 6.65 Hz, 1H), 4.15 (s, 3H), 2.05 (tt, *J* = 5.02, 8.41 Hz, 1H), 1.55 (d, *J* = 6.53 Hz, 6H), 1.11 - 1.02 (m, 2H), 0.94 - 0.85 (m, 2H). <sup>13</sup>C NMR (101 MHz, DMSO-*d*<sub>6</sub>) δ ppm 161.1, 159.6, 151.0, 150.4, 146.6, 146.3, 141.0, 140.5, 137.2, 135.6, 133.9, 121.6, 119.6, 113.9, 105.6, 100.2, 58.0, 48.9, 23.6, 13.1, 10.2. HRMS (*m/z*): [M + H]<sup>+</sup> calcd. for C<sub>23</sub>H<sub>25</sub>N<sub>8</sub>O<sub>2</sub> 445.2095; found: 445.2090. HPLC (CH<sub>3</sub>CN in 0.1% TFA): *t*<sub>R</sub> = 1.44 min (100% purity).

**Compound 19: 1-(5-(Dimethylamino)pyridin-3-yl)-N-(6-(4-isopropyl-4H-1,2,4-triazol-3-yl)pyridin-2-yl)-3-methoxy-1H-pyrazole-4-carboxamide**

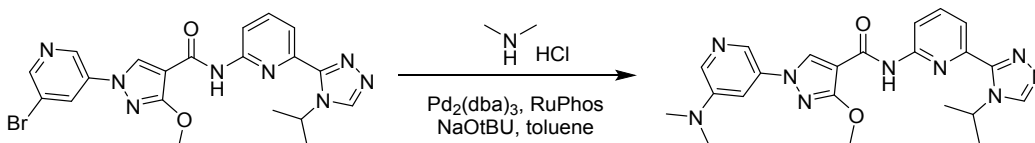

To a solution of 1-(5-bromopyridin-3-yl)-N-(6-(4-isopropyl-4H-1,2,4-triazol-3-yl)pyridin-

2-yl)-3-methoxy-1*H*-pyrazole-4-carboxamide (100 mg, 0.21 mmol), dimethylamine hydrochloride (20.2 mg, 0.25 mmol), RuPhos (19.3 mg, 0.041 mmol), NaOtBu (79.5 mg, 0.83 mmol) and Pd<sub>2</sub>(dba)<sub>3</sub> (19 mg, 0.021 mmol) in toluene (8 mL) was heated at 100 °C for 12 h. The mixture was concentrated and purified by prep-HPLC (using a Waters Xbridge Prep OBD C18 150 x 30 mm x 5 μm column; and using water (containing 0.04% NH<sub>3</sub>H<sub>2</sub>O+10mM NH<sub>4</sub>HCO<sub>3</sub>)-MeCN as mobile phase; from 29-43%, at a 25 mL/min flow rate) to give the title compound (15 mg, 16.%) as a white solid. <sup>1</sup>H NMR (400 MHz, DMSO-*d*<sub>6</sub>) δ ppm 9.47 (s, 1H), 9.21 (s, 1H), 8.92 (s, 1H), 8.42 (d, *J* = 2.0 Hz, 1H), 8.27 (d, *J* = 8.4 Hz, 1H), 8.10 - 8.01 (m, 2H), 7.85 (d, *J* = 7.6 Hz, 1H), 7.48 (t, *J* = 2.4 Hz, 1H), 5.38 (quin, *J* = 6.4 Hz, 1H), 4.16 (s, 3H), 3.03 (s, 6H), 1.56 (d, *J* = 6.8 Hz, 6H). <sup>1</sup>H NMR (400 MHz, DMSO-*d*<sub>6</sub>) δ ppm 9.45 (s, 1H), 9.19 (s, 1H), 8.91 (s, 1H), 8.40 (d, *J* = 2.01 Hz, 1H), 8.26 (dd, *J* = 0.88, 8.41 Hz, 1H), 8.08 - 8.00 (m, 2H), 7.84 (dd, *J* = 0.88, 7.66 Hz, 1H), 7.46 (t, *J* = 2.38 Hz, 1H), 5.37 (spt, *J* = 6.65 Hz, 1H), 4.15 (s, 3H), 3.02 (s, 6H), 1.55 (d, *J* = 6.78 Hz, 6H). <sup>13</sup>C NMR (101 MHz, DMSO-*d*<sub>6</sub>) δ ppm 161.0, 159.7, 151.1, 150.4, 146.8, 146.6, 140.5, 135.9, 133.8, 133.5, 133.3, 127.4, 119.5, 113.9, 107.6, 105.3, 57.9, 48.9, 40.2, 23.6. HRMS (*m/z*): [M + H]<sup>+</sup> calcd. for C<sub>22</sub>H<sub>26</sub>N<sub>9</sub>O<sub>2</sub> 448.2204; found: 448.2193. HPLC (CH<sub>3</sub>CN in 0.1% TFA): *t*<sub>R</sub> = 1.27 min (97% purity).

**Compound 20: *N*-(6-(4-Isopropyl-4*H*-1,2,4-triazol-3-yl)pyridin-2-yl)-3-methoxy-1-(pyrimidin-5-yl)-1*H*-pyrazole-4-carboxamide**

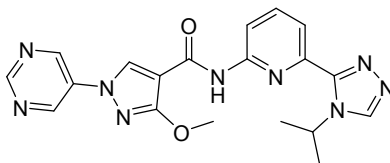

The title compound was synthesized according to the general procedure described in Compound 17 and using 5-bromopyrimidine. The final product was purified by prep-HPLC (Xtimate C18 150 x 25mm x 5 μm, water (10mM NH<sub>4</sub>HCO<sub>3</sub>)-MeCN as mobile phase, from 23 - 53%, flow rate (ml/min): 25) to give the title compound (34 mg, yield 9.2% for the last two steps) as a white solid. <sup>1</sup>H NMR (400 MHz, DMSO-*d*<sub>6</sub>) δ ppm 9.49 (s, 1H), 9.36 (s, 2H), 9.27 (s, 1H), 9.17 (s, 1H), 8.92 (s, 1H), 8.26 (d, *J* = 8.0 Hz, 1H), 8.05 (t, *J* = 8.0 Hz, 1H), 7.86 (d, *J* = 7.2 Hz, 1H), 5.48 - 5.31 (m, 1H), 4.18 (s, 3H), 1.56 (d, *J* = 6.8 Hz, 6H). <sup>1</sup>H NMR (600 MHz, DMSO-*d*<sub>6</sub>) δ ppm 9.46 (s, 1H), 9.34 (s, 2H), 9.22 (s, 1H), 9.15 (s, 1H), 8.87 (s, 1H), 8.27 - 8.23 (m, 1H), 8.04

(t,  $J=7.98$  Hz, 1H), 7.86 (dd,  $J=0.73, 7.70$  Hz, 1H), 5.39 (quin,  $J=6.74$  Hz, 1H), 4.18 (s, 3H), 1.56 (d,  $J=6.79$  Hz, 6H).  $^{13}\text{C}$  NMR (151 MHz,  $\text{DMSO-}d_6$ )  $\delta$  ppm 161.1, 158.7, 155.7, 150.4, 149.8, 146.5, 146.1, 143.1, 139.8, 133.8, 133.6, 119.0, 113.4, 105.9, 57.5, 48.2, 22.9. HRMS ( $m/z$ ):  $[\text{M} + \text{H}]^+$  calcd. for  $\text{C}_{19}\text{H}_{20}\text{N}_9\text{O}_2$  406.1734; found: 406.1742. HPLC ( $\text{CH}_3\text{CN}$  in 0.1% TFA):  $t_R = 1.39$  min (100% purity).

**Compound 21:** *N*-(6-(4-Isopropyl-4*H*-1,2,4-triazol-3-yl)pyridin-2-yl)-3-methoxy-1-(pyrazin-2-yl)-1*H*-pyrazole-4-carboxamide

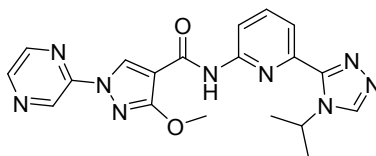

The title compound was synthesized according to the general procedure described in Compound 17 and using 2-chloropyrazine. The final product was purified by prep-HPLC (using a Waters Xbridge Prep OBD C18 150 x 30mm x 5  $\mu\text{m}$  column, and using water (containing 0.05% ammonia hydroxide v/v)-MeCN as mobile phase, from 24-54%, at a 25 mL/min flow rate) to give the title compound (22 mg, 8% for the last two steps) as a white solid.  $^1\text{H}$  NMR (400 MHz,  $\text{DMSO-}d_6$ )  $\delta$  ppm 9.74 (s, 1H), 9.17 (d,  $J=1.6$  Hz, 1H), 9.10 (s, 1H), 8.91 (s, 1H), 8.67 (d,  $J=2.4$  Hz, 1H), 8.61 (m, 1H), 8.23 (dd,  $J=3.6\text{Hz}, 0.8\text{Hz}$ , 1H), 8.04 (t,  $J=8.0$  Hz, 1H), 7.85 (dd,  $J=7.6, 0.8$  Hz, 1H), 5.49 - 5.39 (m, 1H), 4.17 (s, 3H), 1.53 (d,  $J=6.8$  Hz, 6H).  $^1\text{H}$  NMR (600 MHz,  $\text{DMSO-}d_6$ )  $\delta$  ppm 9.65 (br s, 1H), 9.17 (s, 1H), 9.05 (s, 1H), 8.86 (s, 1H), 8.66 (d,  $J=2.38$  Hz, 1H), 8.59 (d,  $J=1.28$  Hz, 1H), 8.23 (d,  $J=8.25$  Hz, 1H), 8.03 (t,  $J=7.98$  Hz, 1H), 7.85 (d,  $J=7.70$  Hz, 1H), 5.44 (quin,  $J=6.69$  Hz, 1H), 4.18 (s, 3H), 1.54 (d,  $J=6.79$  Hz, 6H).  $^{13}\text{C}$  NMR (151 MHz,  $\text{DMSO-}d_6$ )  $\delta$  ppm 161.6, 158.7, 150.5, 149.8, 146.1, 145.8, 143.0, 142.7, 142.5, 139.7, 134.3, 131.7, 119.0, 113.7, 106.3, 57.3, 48.1, 23.0. HRMS ( $m/z$ ):  $[\text{M} + \text{H}]^+$  calcd. for  $\text{C}_{19}\text{H}_{20}\text{N}_9\text{O}_2$  406.1734; found: 406.1727. HPLC ( $\text{CH}_3\text{CN}$  in 0.1% TFA):  $t_R = 1.58$  min (100% purity).



**(ii) Experimental conditions for crystallization, collection and refinement statistics for compound 21**

Crystallization was performed using an E.coli expressed human ASK1 construct encoding residues 659-951 encoding a T838E mutation at 7 mg/mL with compound Compound **21** added to 0.5 mM. Crystals grew in 0.1M BisTRIS pH 5.5, 0.2 M ammonium acetate, 3% sorbitol and 12% PEG3350 and X-ray diffraction data was collected at the Swiss Light Source facility (PSI, Xo6DA (PXIII)).

**(iii) Kinase selectivity profile for compound 21**

| Compound | DiscoverX Gene Symbol         | Entrez Symbol | Gene | Percent Control | Compound concentration (nM) |
|----------|-------------------------------|---------------|------|-----------------|-----------------------------|
| 21       | AAK1                          | AAK1          |      | 37              | 100                         |
| 21       | ABL1(E255K)-phosphorylated    | ABL1          |      | 81              | 100                         |
| 21       | ABL1(F317I)-nonphosphorylated | ABL1          |      | 89              | 100                         |
| 21       | ABL1(F317I)-phosphorylated    | ABL1          |      | 78              | 100                         |
| 21       | ABL1(F317L)-nonphosphorylated | ABL1          |      | 71              | 100                         |
| 21       | ABL1(F317L)-phosphorylated    | ABL1          |      | 68              | 100                         |
| 21       | ABL1(H396P)-nonphosphorylated | ABL1          |      | 34              | 100                         |
| 21       | ABL1(H396P)-phosphorylated    | ABL1          |      | 79              | 100                         |
| 21       | ABL1(M351T)-phosphorylated    | ABL1          |      | 66              | 100                         |
| 21       | ABL1(Q252H)-nonphosphorylated | ABL1          |      | 11              | 100                         |
| 21       | ABL1(Q252H)-phosphorylated    | ABL1          |      | 22              | 100                         |
| 21       | ABL1(T315I)-nonphosphorylated | ABL1          |      | 12              | 100                         |
| 21       | ABL1(T315I)-phosphorylated    | ABL1          |      | 6.2             | 100                         |
| 21       | ABL1(Y253F)-phosphorylated    | ABL1          |      | 96              | 100                         |
| 21       | ABL1-nonphosphorylated        | ABL1          |      | 57              | 100                         |
| 21       | ABL1-phosphorylated           | ABL1          |      | 75              | 100                         |
| 21       | ABL2                          | ABL2          |      | 95              | 100                         |
| 21       | ACVR1                         | ACVR1         |      | 97              | 100                         |
| 21       | ACVR1B                        | ACVR1B        |      | 86              | 100                         |
| 21       | ACVR2A                        | ACVR2A        |      | 66              | 100                         |
| 21       | ACVR2B                        | ACVR2B        |      | 100             | 100                         |
| 21       | ACVRL1                        | ACVRL1        |      | 100             | 100                         |
| 21       | ADCK3                         | CABC1         |      | 93              | 100                         |

|    |             |        |      |     |
|----|-------------|--------|------|-----|
| 21 | ADCK4       | ADCK4  | 93   | 100 |
| 21 | AKT1        | AKT1   | 100  | 100 |
| 21 | AKT2        | AKT2   | 96   | 100 |
| 21 | AKT3        | AKT3   | 83   | 100 |
| 21 | ALK         | ALK    | 80   | 100 |
| 21 | ALK(C1156Y) | ALK    | 83   | 100 |
| 21 | ALK(L1196M) | ALK    | 90   | 100 |
| 21 | AMPK-alpha1 | PRKAA1 | 81   | 100 |
| 21 | AMPK-alpha2 | PRKAA2 | 100  | 100 |
| 21 | ANKK1       | ANKK1  | 40   | 100 |
| 21 | ARK5        | NUAK1  | 16   | 100 |
| 21 | ASK1        | MAP3K5 | 2    | 100 |
| 21 | ASK2        | MAP3K6 | 76   | 100 |
| 21 | AURKA       | AURKA  | 100  | 100 |
| 21 | AURKB       | AURKB  | 97   | 100 |
| 21 | AURKC       | AURKC  | 67   | 100 |
| 21 | AXL         | AXL    | 49   | 100 |
| 21 | BIKE        | BMP2K  | 21   | 100 |
| 21 | BLK         | BLK    | 100  | 100 |
| 21 | BMPR1A      | BMPR1A | 81   | 100 |
| 21 | BMPR1B      | BMPR1B | 92   | 100 |
| 21 | BMPR2       | BMPR2  | 0.85 | 100 |
| 21 | BMX         | BMX    | 97   | 100 |
| 21 | BRAF        | BRAF   | 82   | 100 |
| 21 | BRAF(V600E) | BRAF   | 94   | 100 |
| 21 | BRK         | PTK6   | 100  | 100 |
| 21 | BRSK1       | BRSK1  | 99   | 100 |
| 21 | BRSK2       | BRSK2  | 92   | 100 |
| 21 | BTK         | BTK    | 97   | 100 |
| 21 | BUB1        | BUB1   | 84   | 100 |
| 21 | CAMK1       | CAMK1  | 69   | 100 |
| 21 | CAMK1B      | PNCK   | 65   | 100 |
| 21 | CAMK1D      | CAMK1D | 76   | 100 |
| 21 | CAMK1G      | CAMK1G | 88   | 100 |
| 21 | CAMK2A      | CAMK2A | 60   | 100 |
| 21 | CAMK2B      | CAMK2B | 60   | 100 |
| 21 | CAMK2D      | CAMK2D | 85   | 100 |
| 21 | CAMK2G      | CAMK2G | 88   | 100 |
| 21 | CAMK4       | CAMK4  | 100  | 100 |
| 21 | CAMKK1      | CAMKK1 | 81   | 100 |
| 21 | CAMKK2      | CAMKK2 | 55   | 100 |

|    |                     |          |     |     |
|----|---------------------|----------|-----|-----|
| 21 | CASK                | CASK     | 86  | 100 |
| 21 | CDC2L1              | CDK11B   | 100 | 100 |
| 21 | CDC2L2              | CDC2L2   | 96  | 100 |
| 21 | CDC2L5              | CDK13    | 85  | 100 |
| 21 | CDK11               | CDK19    | 91  | 100 |
| 21 | CDK2                | CDK2     | 100 | 100 |
| 21 | CDK3                | CDK3     | 100 | 100 |
| 21 | CDK4                | CDK4     | 90  | 100 |
| 21 | CDK4-cyclinD1       | CDK4     | 100 | 100 |
| 21 | CDK4-cyclinD3       | CDK4     | 92  | 100 |
| 21 | CDK5                | CDK5     | 93  | 100 |
| 21 | CDK7                | CDK7     | 36  | 100 |
| 21 | CDK8                | CDK8     | 96  | 100 |
| 21 | CDK9                | CDK9     | 98  | 100 |
| 21 | CDKL1               | CDKL1    | 75  | 100 |
| 21 | CDKL2               | CDKL2    | 93  | 100 |
| 21 | CDKL3               | CDKL3    | 94  | 100 |
| 21 | CDKL5               | CDKL5    | 62  | 100 |
| 21 | CHEK1               | CHEK1    | 93  | 100 |
| 21 | CHEK2               | CHEK2    | 72  | 100 |
| 21 | CIT                 | CIT      | 0.2 | 100 |
| 21 | CLK1                | CLK1     | 2.5 | 100 |
| 21 | CLK2                | CLK2     | 12  | 100 |
| 21 | CLK3                | CLK3     | 61  | 100 |
| 21 | CLK4                | CLK4     | 4.9 | 100 |
| 21 | CSF1R               | CSF1R    | 86  | 100 |
| 21 | CSF1R-autoinhibited | CSF1R    | 98  | 100 |
| 21 | CSK                 | CSK      | 82  | 100 |
| 21 | CSNK1A1             | CSNK1A1  | 77  | 100 |
| 21 | CSNK1A1L            | CSNK1A1L | 84  | 100 |
| 21 | CSNK1D              | CSNK1D   | 100 | 100 |
| 21 | CSNK1E              | CSNK1E   | 93  | 100 |
| 21 | CSNK1G1             | CSNK1G1  | 69  | 100 |
| 21 | CSNK1G2             | CSNK1G2  | 95  | 100 |
| 21 | CSNK1G3             | CSNK1G3  | 79  | 100 |
| 21 | CSNK2A1             | CSNK2A1  | 100 | 100 |
| 21 | CSNK2A2             | CSNK2A2  | 100 | 100 |
| 21 | CTK                 | MATK     | 75  | 100 |
| 21 | DAPK1               | DAPK1    | 99  | 100 |
| 21 | DAPK2               | DAPK2    | 95  | 100 |
| 21 | DAPK3               | DAPK3    | 100 | 100 |

|    |                           |          |     |     |
|----|---------------------------|----------|-----|-----|
| 21 | DCAMKL1                   | DCLK1    | 68  | 100 |
| 21 | DCAMKL2                   | DCLK2    | 93  | 100 |
| 21 | DCAMKL3                   | DCLK3    | 1   | 100 |
| 21 | DDR1                      | DDR1     | 100 | 100 |
| 21 | DDR2                      | DDR2     | 91  | 100 |
| 21 | DLK                       | MAP3K12  | 91  | 100 |
| 21 | DMPK                      | DMPK     | 25  | 100 |
| 21 | DMPK2                     | CDC42BPG | 92  | 100 |
| 21 | DRAK1                     | STK17A   | 6.7 | 100 |
| 21 | DRAK2                     | STK17B   | 3.4 | 100 |
| 21 | DYRK1A                    | DYRK1A   | 0.7 | 100 |
| 21 | DYRK1B                    | DYRK1B   | 11  | 100 |
| 21 | DYRK2                     | DYRK2    | 87  | 100 |
| 21 | EGFR                      | EGFR     | 89  | 100 |
| 21 | EGFR(E746-A750del)        | EGFR     | 100 | 100 |
| 21 | EGFR(G719C)               | EGFR     | 95  | 100 |
| 21 | EGFR(G719S)               | EGFR     | 79  | 100 |
| 21 | EGFR(L747-E749del, A750P) | EGFR     | 94  | 100 |
| 21 | EGFR(L747-S752del, P753S) | EGFR     | 100 | 100 |
| 21 | EGFR(L747-T751del,Sins)   | EGFR     | 100 | 100 |
| 21 | EGFR(L858R)               | EGFR     | 97  | 100 |
| 21 | EGFR(L858R,T790M)         | EGFR     | 84  | 100 |
| 21 | EGFR(L861Q)               | EGFR     | 100 | 100 |
| 21 | EGFR(S752-I759del)        | EGFR     | 86  | 100 |
| 21 | EGFR(T790M)               | EGFR     | 92  | 100 |
| 21 | EIF2AK1                   | EIF2AK1  | 78  | 100 |
| 21 | EPHA1                     | EPHA1    | 71  | 100 |
| 21 | EPHA2                     | EPHA2    | 98  | 100 |
| 21 | EPHA3                     | EPHA3    | 88  | 100 |
| 21 | EPHA4                     | EPHA4    | 95  | 100 |
| 21 | EPHA5                     | EPHA5    | 100 | 100 |
| 21 | EPHA6                     | EPHA6    | 97  | 100 |
| 21 | EPHA7                     | EPHA7    | 93  | 100 |
| 21 | EPHA8                     | EPHA8    | 92  | 100 |
| 21 | EPHB1                     | EPHB1    | 92  | 100 |
| 21 | EPHB2                     | EPHB2    | 100 | 100 |
| 21 | EPHB3                     | EPHB3    | 98  | 100 |
| 21 | EPHB4                     | EPHB4    | 100 | 100 |
| 21 | EPHB6                     | EPHB6    | 92  | 100 |
| 21 | ERBB2                     | ERBB2    | 96  | 100 |
| 21 | ERBB3                     | ERBB3    | 83  | 100 |

|    |                       |         |      |     |
|----|-----------------------|---------|------|-----|
| 21 | ERBB4                 | ERBB4   | 89   | 100 |
| 21 | ERK1                  | MAPK3   | 100  | 100 |
| 21 | ERK2                  | MAPK1   | 99   | 100 |
| 21 | ERK3                  | MAPK6   | 90   | 100 |
| 21 | ERK4                  | MAPK4   | 100  | 100 |
| 21 | ERK5                  | MAPK7   | 100  | 100 |
| 21 | ERK8                  | MAPK15  | 79   | 100 |
| 21 | ERN1                  | ERN1    | 62   | 100 |
| 21 | FAK                   | PTK2    | 100  | 100 |
| 21 | FER                   | FER     | 70   | 100 |
| 21 | FES                   | FES     | 99   | 100 |
| 21 | FGFR1                 | FGFR1   | 85   | 100 |
| 21 | FGFR2                 | FGFR2   | 51   | 100 |
| 21 | FGFR3                 | FGFR3   | 100  | 100 |
| 21 | FGFR3(G697C)          | FGFR3   | 82   | 100 |
| 21 | FGFR4                 | FGFR4   | 99   | 100 |
| 21 | FGR                   | FGR     | 92   | 100 |
| 21 | FLT1                  | FLT1    | 98   | 100 |
| 21 | FLT3                  | FLT3    | 16   | 100 |
| 21 | FLT3(D835H)           | FLT3    | 30   | 100 |
| 21 | FLT3(D835V)           | FLT3    | 9.6  | 100 |
| 21 | FLT3(D835Y)           | FLT3    | 14   | 100 |
| 21 | FLT3(ITD)             | FLT3    | 5.3  | 100 |
| 21 | FLT3(ITD,D835V)       | FLT3    | 0.45 | 100 |
| 21 | FLT3(ITD,F691L)       | FLT3    | 0    | 100 |
| 21 | FLT3(K663Q)           | FLT3    | 50   | 100 |
| 21 | FLT3(N841I)           | FLT3    | 6.3  | 100 |
| 21 | FLT3(R834Q)           | FLT3    | 24   | 100 |
| 21 | FLT3-autoinhibited    | FLT3    | 64   | 100 |
| 21 | FLT4                  | FLT4    | 94   | 100 |
| 21 | FRK                   | FRK     | 100  | 100 |
| 21 | FYN                   | FYN     | 79   | 100 |
| 21 | GAK                   | GAK     | 20   | 100 |
| 21 | GCN2(Kin.Dom.2,S808G) | EIF2AK4 | 70   | 100 |
| 21 | GRK1                  | GRK1    | 60   | 100 |
| 21 | GRK2                  | ADRBK1  | 100  | 100 |
| 21 | GRK3                  | ADRBK2  | 90   | 100 |
| 21 | GRK4                  | GRK4    | 29   | 100 |
| 21 | GRK7                  | GRK7    | 64   | 100 |
| 21 | GSK3A                 | GSK3A   | 87   | 100 |
| 21 | GSK3B                 | GSK3B   | 73   | 100 |

|    |                              |        |     |     |
|----|------------------------------|--------|-----|-----|
| 21 | HASPIN                       | GSG2   | 96  | 100 |
| 21 | HCK                          | HCK    | 95  | 100 |
| 21 | HIPK1                        | HIPK1  | 83  | 100 |
| 21 | HIPK2                        | HIPK2  | 86  | 100 |
| 21 | HIPK3                        | HIPK3  | 77  | 100 |
| 21 | HIPK4                        | HIPK4  | 100 | 100 |
| 21 | HPK1                         | MAP4K1 | 58  | 100 |
| 21 | HUNK                         | HUNK   | 100 | 100 |
| 21 | ICK                          | ICK    | 87  | 100 |
| 21 | IGF1R                        | IGF1R  | 100 | 100 |
| 21 | IKK-alpha                    | CHUK   | 84  | 100 |
| 21 | IKK-beta                     | IKBKB  | 84  | 100 |
| 21 | IKK-epsilon                  | IKBKE  | 36  | 100 |
| 21 | INSR                         | INSR   | 100 | 100 |
| 21 | INSRR                        | INSRR  | 89  | 100 |
| 21 | IRAK1                        | IRAK1  | 23  | 100 |
| 21 | IRAK3                        | IRAK3  | 99  | 100 |
| 21 | IRAK4                        | IRAK4  | 37  | 100 |
| 21 | ITK                          | ITK    | 93  | 100 |
| 21 | JAK1(JH1domain-catalytic)    | JAK1   | 88  | 100 |
| 21 | JAK1(JH2domain-pseudokinase) | JAK1   | 100 | 100 |
| 21 | JAK2(JH1domain-catalytic)    | JAK2   | 25  | 100 |
| 21 | JAK3(JH1domain-catalytic)    | JAK3   | 7.7 | 100 |
| 21 | JNK1                         | MAPK8  | 61  | 100 |
| 21 | JNK2                         | MAPK9  | 92  | 100 |
| 21 | JNK3                         | MAPK10 | 77  | 100 |
| 21 | KIT                          | KIT    | 94  | 100 |
| 21 | KIT(A829P)                   | KIT    | 19  | 100 |
| 21 | KIT(D816H)                   | KIT    | 12  | 100 |
| 21 | KIT(D816V)                   | KIT    | 5.2 | 100 |
| 21 | KIT(L576P)                   | KIT    | 63  | 100 |
| 21 | KIT(V559D)                   | KIT    | 83  | 100 |
| 21 | KIT(V559D,T670I)             | KIT    | 80  | 100 |
| 21 | KIT(V559D,V654A)             | KIT    | 68  | 100 |
| 21 | KIT-autoinhibited            | KIT    | 100 | 100 |
| 21 | LATS1                        | LATS1  | 100 | 100 |
| 21 | LATS2                        | LATS2  | 67  | 100 |
| 21 | LCK                          | LCK    | 89  | 100 |
| 21 | LIMK1                        | LIMK1  | 93  | 100 |
| 21 | LIMK2                        | LIMK2  | 96  | 100 |
| 21 | LKB1                         | STK11  | 73  | 100 |

|    |               |          |     |     |
|----|---------------|----------|-----|-----|
| 21 | LOK           | STK10    | 24  | 100 |
| 21 | LRRK2         | LRRK2    | 0   | 100 |
| 21 | LRRK2(G2019S) | LRRK2    | 2   | 100 |
| 21 | LTK           | LTK      | 98  | 100 |
| 21 | LYN           | LYN      | 100 | 100 |
| 21 | LZK           | MAP3K13  | 76  | 100 |
| 21 | MAK           | MAK      | 99  | 100 |
| 21 | MAP3K1        | MAP3K1   | 83  | 100 |
| 21 | MAP3K15       | MAP3K15  | 6.1 | 100 |
| 21 | MAP3K2        | MAP3K2   | 65  | 100 |
| 21 | MAP3K3        | MAP3K3   | 78  | 100 |
| 21 | MAP3K4        | MAP3K4   | 92  | 100 |
| 21 | MAP4K2        | MAP4K2   | 3.6 | 100 |
| 21 | MAP4K3        | MAP4K3   | 11  | 100 |
| 21 | MAP4K4        | MAP4K4   | 7.2 | 100 |
| 21 | MAP4K5        | MAP4K5   | 42  | 100 |
| 21 | MAPKAPK2      | MAPKAPK2 | 67  | 100 |
| 21 | MAPKAPK5      | MAPKAPK5 | 49  | 100 |
| 21 | MARK1         | MARK1    | 96  | 100 |
| 21 | MARK2         | MARK2    | 78  | 100 |
| 21 | MARK3         | MARK3    | 100 | 100 |
| 21 | MARK4         | MARK4    | 91  | 100 |
| 21 | MAST1         | MAST1    | 90  | 100 |
| 21 | MEK1          | MAP2K1   | 78  | 100 |
| 21 | MEK2          | MAP2K2   | 90  | 100 |
| 21 | MEK3          | MAP2K3   | 72  | 100 |
| 21 | MEK4          | MAP2K4   | 87  | 100 |
| 21 | MEK5          | MAP2K5   | 2.9 | 100 |
| 21 | MEK6          | MAP2K6   | 98  | 100 |
| 21 | MELK          | MELK     | 75  | 100 |
| 21 | MERTK         | MERTK    | 96  | 100 |
| 21 | MET           | MET      | 96  | 100 |
| 21 | MET(M1250T)   | MET      | 100 | 100 |
| 21 | MET(Y1235D)   | MET      | 86  | 100 |
| 21 | MINK          | MINK1    | 13  | 100 |
| 21 | MKK7          | MAP2K7   | 100 | 100 |
| 21 | MKNK1         | MKNK1    | 87  | 100 |
| 21 | MKNK2         | MKNK2    | 75  | 100 |
| 21 | MLCK          | MYLK3    | 100 | 100 |
| 21 | MLK1          | MAP3K9   | 93  | 100 |
| 21 | MLK2          | MAP3K10  | 78  | 100 |

|    |           |          |     |     |
|----|-----------|----------|-----|-----|
| 21 | MLK3      | MAP3K11  | 16  | 100 |
| 21 | MRCKA     | CDC42BPA | 78  | 100 |
| 21 | MRCKB     | CDC42BPB | 47  | 100 |
| 21 | MST1      | STK4     | 92  | 100 |
| 21 | MST1R     | MST1R    | 100 | 100 |
| 21 | MST2      | STK3     | 32  | 100 |
| 21 | MST3      | STK24    | 98  | 100 |
| 21 | MST4      | MST4     | 50  | 100 |
| 21 | MTOR      | MTOR     | 49  | 100 |
| 21 | MUSK      | MUSK     | 84  | 100 |
| 21 | MYLK      | MYLK     | 85  | 100 |
| 21 | MYLK2     | MYLK2    | 100 | 100 |
| 21 | MYLK4     | MYLK4    | 94  | 100 |
| 21 | MYO3A     | MYO3A    | 75  | 100 |
| 21 | MYO3B     | MYO3B    | 100 | 100 |
| 21 | NDR1      | STK38    | 82  | 100 |
| 21 | NDR2      | STK38L   | 85  | 100 |
| 21 | NEK1      | NEK1     | 100 | 100 |
| 21 | NEK10     | NEK10    | 79  | 100 |
| 21 | NEK11     | NEK11    | 87  | 100 |
| 21 | NEK2      | NEK2     | 97  | 100 |
| 21 | NEK3      | NEK3     | 84  | 100 |
| 21 | NEK4      | NEK4     | 96  | 100 |
| 21 | NEK5      | NEK5     | 90  | 100 |
| 21 | NEK6      | NEK6     | 88  | 100 |
| 21 | NEK7      | NEK7     | 93  | 100 |
| 21 | NEK9      | NEK9     | 93  | 100 |
| 21 | NIK       | MAP3K14  | 22  | 100 |
| 21 | NIM1      | MGC42105 | 75  | 100 |
| 21 | NLK       | NLK      | 69  | 100 |
| 21 | OSR1      | OXR1     | 62  | 100 |
| 21 | p38-alpha | MAPK14   | 90  | 100 |
| 21 | p38-beta  | MAPK11   | 92  | 100 |
| 21 | p38-delta | MAPK13   | 85  | 100 |
| 21 | p38-gamma | MAPK12   | 88  | 100 |
| 21 | PAK1      | PAK1     | 96  | 100 |
| 21 | PAK2      | PAK2     | 85  | 100 |
| 21 | PAK3      | PAK3     | 71  | 100 |
| 21 | PAK4      | PAK4     | 92  | 100 |
| 21 | PAK6      | PAK6     | 95  | 100 |
| 21 | PAK7      | PAK7     | 84  | 100 |



|    |                       |             |     |     |
|----|-----------------------|-------------|-----|-----|
| 21 | PCTK1                 | CDK16       | 83  | 100 |
| 21 | PCTK2                 | CDK17       | 98  | 100 |
| 21 | PCTK3                 | CDK18       | 93  | 100 |
| 21 | PDGFRA                | PDGFRA      | 23  | 100 |
| 21 | PDGFRB                | PDGFRB      | 24  | 100 |
| 21 | PDPK1                 | PDPK1       | 97  | 100 |
| 21 | PFCDPK1(P.falciparum) | CDPK1       | 100 | 100 |
| 21 | PFPK5(P.falciparum)   | MAL13P1.279 | 89  | 100 |
| 21 | PFTAIRE2              | CDK15       | 89  | 100 |
| 21 | PFTK1                 | CDK14       | 100 | 100 |
| 21 | PHKG1                 | PHKG1       | 100 | 100 |
| 21 | PHKG2                 | PHKG2       | 100 | 100 |
| 21 | PIK3C2B               | PIK3C2B     | 90  | 100 |
| 21 | PIK3C2G               | PIK3C2G     | 73  | 100 |
| 21 | PIK3CA                | PIK3CA      | 99  | 100 |
| 21 | PIK3CA(C420R)         | PIK3CA      | 84  | 100 |
| 21 | PIK3CA(E542K)         | PIK3CA      | 74  | 100 |
| 21 | PIK3CA(E545A)         | PIK3CA      | 89  | 100 |
| 21 | PIK3CA(E545K)         | PIK3CA      | 98  | 100 |
| 21 | PIK3CA(H1047L)        | PIK3CA      | 100 | 100 |
| 21 | PIK3CA(H1047Y)        | PIK3CA      | 98  | 100 |
| 21 | PIK3CA(I800L)         | PIK3CA      | 66  | 100 |
| 21 | PIK3CA(M1043I)        | PIK3CA      | 95  | 100 |
| 21 | PIK3CA(Q546K)         | PIK3CA      | 100 | 100 |
| 21 | PIK3CB                | PIK3CB      | 100 | 100 |
| 21 | PIK3CD                | PIK3CD      | 51  | 100 |
| 21 | PIK3CG                | PIK3CG      | 95  | 100 |
| 21 | PIK4CB                | PI4KB       | 31  | 100 |
| 21 | PIKFYVE               | PIKFYVE     | 83  | 100 |
| 21 | PIM1                  | PIM1        | 97  | 100 |
| 21 | PIM2                  | PIM2        | 100 | 100 |
| 21 | PIM3                  | PIM3        | 94  | 100 |
| 21 | PIP5K1A               | PIP5K1A     | 17  | 100 |
| 21 | PIP5K1C               | PIP5K1C     | 82  | 100 |
| 21 | PIP5K2B               | PIP4K2B     | 40  | 100 |
| 21 | PIP5K2C               | PIP4K2C     | 87  | 100 |
| 21 | PKAC-alpha            | PRKACA      | 99  | 100 |
| 21 | PKAC-beta             | PRKACB      | 82  | 100 |
| 21 | PKMYT1                | PKMYT1      | 77  | 100 |
| 21 | PKN1                  | PKN1        | 68  | 100 |
| 21 | PKN2                  | PKN2        | 41  | 100 |

|    |                               |          |     |     |
|----|-------------------------------|----------|-----|-----|
| 21 | PKNB(M.tuberculosis)          | pknB     | 93  | 100 |
| 21 | PLK1                          | PLK1     | 87  | 100 |
| 21 | PLK2                          | PLK2     | 54  | 100 |
| 21 | PLK3                          | PLK3     | 78  | 100 |
| 21 | PLK4                          | PLK4     | 95  | 100 |
| 21 | PRKCD                         | PRKCD    | 40  | 100 |
| 21 | PRKCE                         | PRKCE    | 66  | 100 |
| 21 | PRKCH                         | PRKCH    | 56  | 100 |
| 21 | PRKCI                         | PRKCI    | 100 | 100 |
| 21 | PRKCQ                         | PRKCQ    | 71  | 100 |
| 21 | PRKD1                         | PRKD1    | 26  | 100 |
| 21 | PRKD2                         | PRKD2    | 5.2 | 100 |
| 21 | PRKD3                         | PRKD3    | 6.5 | 100 |
| 21 | PRKG1                         | PRKG1    | 90  | 100 |
| 21 | PRKG2                         | PRKG2    | 96  | 100 |
| 21 | PRKR                          | EIF2AK2  | 97  | 100 |
| 21 | PRKX                          | PRKX     | 100 | 100 |
| 21 | PRP4                          | PRPF4B   | 96  | 100 |
| 21 | PYK2                          | PTK2B    | 99  | 100 |
| 21 | QSK                           | KIAA0999 | 94  | 100 |
| 21 | RAF1                          | RAF1     | 100 | 100 |
| 21 | RET                           | RET      | 65  | 100 |
| 21 | RET(M918T)                    | RET      | 53  | 100 |
| 21 | RET(V804L)                    | RET      | 24  | 100 |
| 21 | RET(V804M)                    | RET      | 45  | 100 |
| 21 | RIOK1                         | RIOK1    | 28  | 100 |
| 21 | RIOK2                         | RIOK2    | 73  | 100 |
| 21 | RIOK3                         | RIOK3    | 19  | 100 |
| 21 | RIPK1                         | RIPK1    | 90  | 100 |
| 21 | RIPK2                         | RIPK2    | 100 | 100 |
| 21 | RIPK4                         | RIPK4    | 81  | 100 |
| 21 | RIPK5                         | DSTYK    | 67  | 100 |
| 21 | ROCK1                         | ROCK1    | 4.2 | 100 |
| 21 | ROCK2                         | ROCK2    | 3.6 | 100 |
| 21 | ROS1                          | ROS1     | 17  | 100 |
| 21 | RPS6KA4(Kin.Dom.1-N-terminal) | RPS6KA4  | 94  | 100 |
| 21 | RPS6KA4(Kin.Dom.2-C-terminal) | RPS6KA4  | 72  | 100 |
| 21 | RPS6KA5(Kin.Dom.1-N-terminal) | RPS6KA5  | 100 | 100 |
| 21 | RPS6KA5(Kin.Dom.2-C-terminal) | RPS6KA5  | 88  | 100 |
| 21 | RSK1(Kin.Dom.1-N-terminal)    | RPS6KA1  | 73  | 100 |
| 21 | RSK1(Kin.Dom.2-C-terminal)    | RPS6KA1  | 96  | 100 |

|    |                            |         |     |     |
|----|----------------------------|---------|-----|-----|
| 21 | RSK2(Kin.Dom.1-N-terminal) | RPS6KA3 | 3.7 | 100 |
| 21 | RSK2(Kin.Dom.2-C-terminal) | RPS6KA3 | 78  | 100 |
| 21 | RSK3(Kin.Dom.1-N-terminal) | RPS6KA2 | 7.4 | 100 |
| 21 | RSK3(Kin.Dom.2-C-terminal) | RPS6KA2 | 100 | 100 |
| 21 | RSK4(Kin.Dom.1-N-terminal) | RPS6KA6 | 0.5 | 100 |
| 21 | RSK4(Kin.Dom.2-C-terminal) | RPS6KA6 | 100 | 100 |
| 21 | S6K1                       | RPS6KB1 | 63  | 100 |
| 21 | SBK1                       | SBK1    | 48  | 100 |
| 21 | SGK                        | SGK1    | 67  | 100 |
| 21 | SgK110                     | SgK110  | 100 | 100 |
| 21 | SGK2                       | SGK2    | 82  | 100 |
| 21 | SGK3                       | SGK3    | 100 | 100 |
| 21 | SIK                        | SIK1    | 97  | 100 |
| 21 | SIK2                       | SIK2    | 67  | 100 |
| 21 | SLK                        | SLK     | 28  | 100 |
| 21 | SNARK                      | NUAK2   | 3.2 | 100 |
| 21 | SNRK                       | SNRK    | 79  | 100 |
| 21 | SRC                        | SRC     | 99  | 100 |
| 21 | SRMS                       | SRMS    | 97  | 100 |
| 21 | SRPK1                      | SRPK1   | 31  | 100 |
| 21 | SRPK2                      | SRPK2   | 95  | 100 |
| 21 | SRPK3                      | SRPK3   | 26  | 100 |
| 21 | STK16                      | STK16   | 87  | 100 |
| 21 | STK33                      | STK33   | 38  | 100 |
| 21 | STK35                      | STK35   | 59  | 100 |
| 21 | STK36                      | STK36   | 94  | 100 |
| 21 | STK39                      | STK39   | 80  | 100 |
| 21 | SYK                        | SYK     | 86  | 100 |
| 21 | TAK1                       | MAP3K7  | 3.6 | 100 |
| 21 | TAOK1                      | TAOK1   | 77  | 100 |
| 21 | TAOK2                      | TAOK2   | 95  | 100 |
| 21 | TAOK3                      | TAOK3   | 88  | 100 |
| 21 | TBK1                       | TBK1    | 51  | 100 |
| 21 | TEC                        | TEC     | 83  | 100 |
| 21 | TESK1                      | TESK1   | 65  | 100 |
| 21 | TGFBR1                     | TGFBR1  | 95  | 100 |
| 21 | TGFBR2                     | TGFBR2  | 93  | 100 |
| 21 | TIE1                       | TIE1    | 87  | 100 |
| 21 | TIE2                       | TEK     | 78  | 100 |
| 21 | TLK1                       | TLK1    | 90  | 100 |
| 21 | TLK2                       | TLK2    | 100 | 100 |

|    |                              |         |     |     |
|----|------------------------------|---------|-----|-----|
| 21 | TNIK                         | TNIK    | 9.4 | 100 |
| 21 | TNK1                         | TNK1    | 57  | 100 |
| 21 | TNK2                         | TNK2    | 100 | 100 |
| 21 | TNNI3K                       | TNNI3K  | 100 | 100 |
| 21 | TRKA                         | NTRK1   | 100 | 100 |
| 21 | TRKB                         | NTRK2   | 100 | 100 |
| 21 | TRKC                         | NTRK3   | 100 | 100 |
| 21 | TRPM6                        | TRPM6   | 92  | 100 |
| 21 | TSSK1B                       | TSSK1B  | 100 | 100 |
| 21 | TSSK3                        | TSSK3   | 77  | 100 |
| 21 | TTK                          | TTK     | 70  | 100 |
| 21 | TXK                          | TXK     | 85  | 100 |
| 21 | TYK2(JH1domain-catalytic)    | TYK2    | 20  | 100 |
| 21 | TYK2(JH2domain-pseudokinase) | TYK2    | 90  | 100 |
| 21 | TYRO3                        | TYRO3   | 99  | 100 |
| 21 | ULK1                         | ULK1    | 6.8 | 100 |
| 21 | ULK2                         | ULK2    | 0.6 | 100 |
| 21 | ULK3                         | ULK3    | 87  | 100 |
| 21 | VEGFR2                       | KDR     | 100 | 100 |
| 21 | VPS34                        | PIK3C3  | 36  | 100 |
| 21 | VRK2                         | VRK2    | 64  | 100 |
| 21 | WEE1                         | WEE1    | 100 | 100 |
| 21 | WEE2                         | WEE2    | 100 | 100 |
| 21 | WNK1                         | WNK1    | 70  | 100 |
| 21 | WNK2                         | WNK2    | 86  | 100 |
| 21 | WNK3                         | WNK3    | 84  | 100 |
| 21 | WNK4                         | WNK4    | 80  | 100 |
| 21 | YANK1                        | STK32A  | 91  | 100 |
| 21 | YANK2                        | STK32B  | 100 | 100 |
| 21 | YANK3                        | STK32C  | 100 | 100 |
| 21 | YES                          | YES1    | 97  | 100 |
| 21 | YSK1                         | STK25   | 87  | 100 |
| 21 | YSK4                         | MAP3K19 | 4.5 | 100 |
| 21 | ZAK                          | ZAK     | 84  | 100 |
| 21 | ZAP70                        | ZAP70   | 73  | 100 |
